# Supplementary material for: Exposure to nano-polystyrene induces metabolic alteration in lipid homeostasis in Caco-2
Source: Royal Society of Chemistry journal article supplement (doi:10.1039/d1en00145k), 2021-01-01
Supplement: d1en00145k1.pdf [file d1en00145k1.pdf]

# **Exposure of nano-polystyrene induces metabolic alteration on lipid homeostasis in Caco-2**

Sun Jo Kim<sup>1</sup>, Nguyen Phuoc Long<sup>2</sup>, Cheol Woon Jung<sup>1</sup>, Nguyen Hoang Anh<sup>1</sup>, Jung Eun Min<sup>1</sup>, Hyung Min Kim<sup>1</sup>, Sung Won Kwon<sup>1,2,\*</sup>

<sup>1</sup>College of Pharmacy, Seoul National University, Seoul, 08826, Republic of Korea

<sup>2</sup>Research Institute of Pharmaceutical Sciences, Seoul National University, Seoul, 08826, Republic of Korea

\*: To whom the correspondence should be addressed: S.W.K. (swkwon@snu.ac.kr)

**Fig. S1. The principal component analysis (PCA) score plots and hierarchical clustering dendrograms for an evaluation of suspension buffer toxicity by untargeted metabolic profiling in positive and negative ionization modes.**

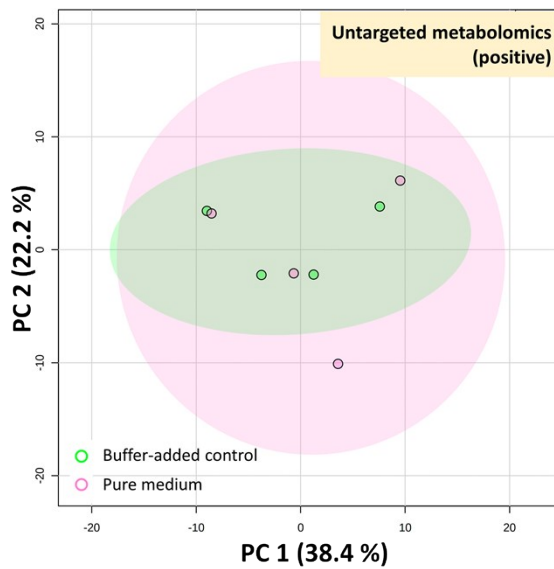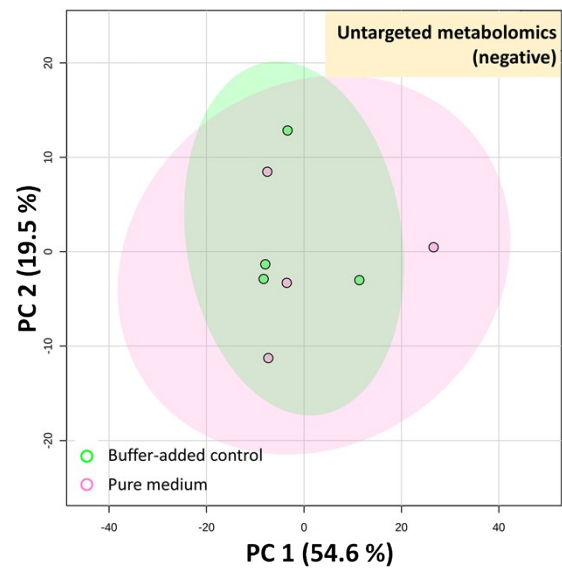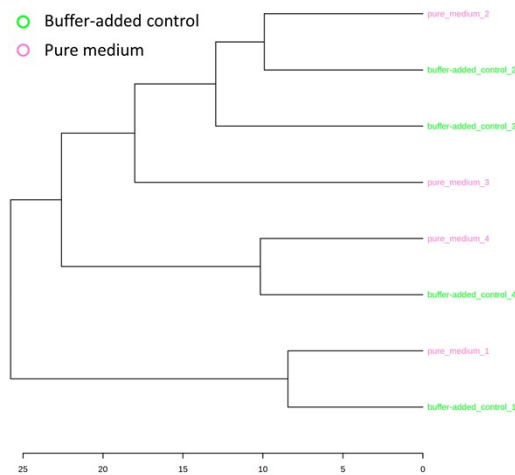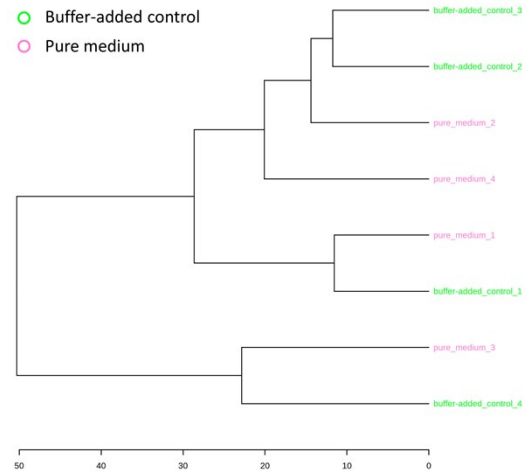

**Fig. S2. The PCA score plots for the acute exposure model. (A)** PCA plots of a three-group comparison from the lipidomics data. **(B)** A PCA plot of a three-group comparison from the large-scale targeted metabolomics data.

**(A)**

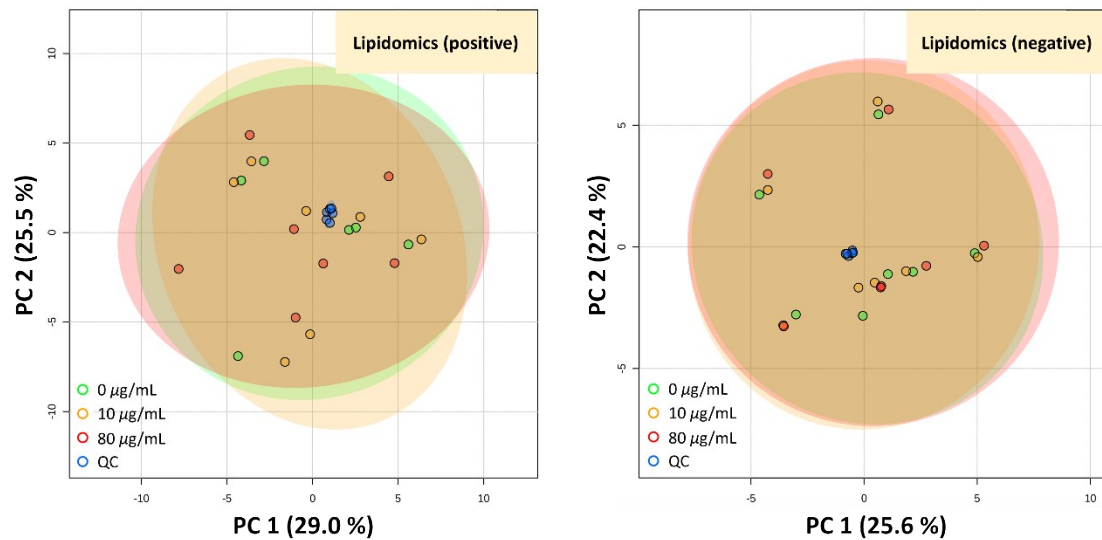

**(B)**

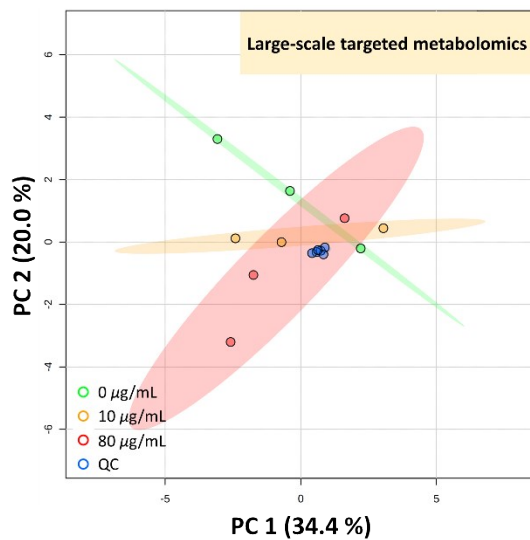

**Fig. S3. Pairwise partial least squares-discriminant analysis and cross-validation for the acute exposure model.**  $R^2$ : coefficient of determination;  $Q^2$ : coefficient of prediction.

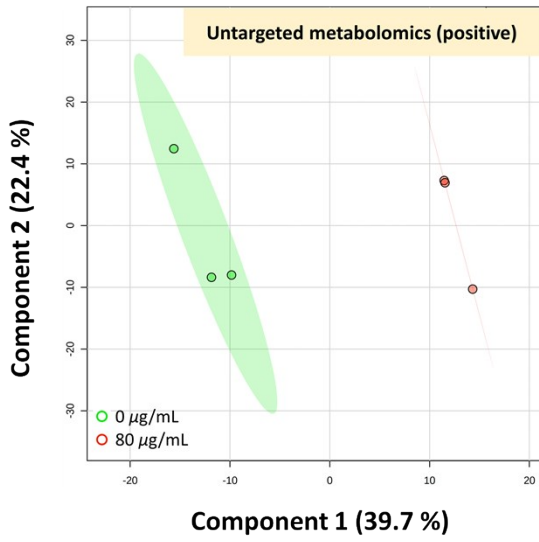

$R^2$ : 0.999,  $Q^2$ : 0.746

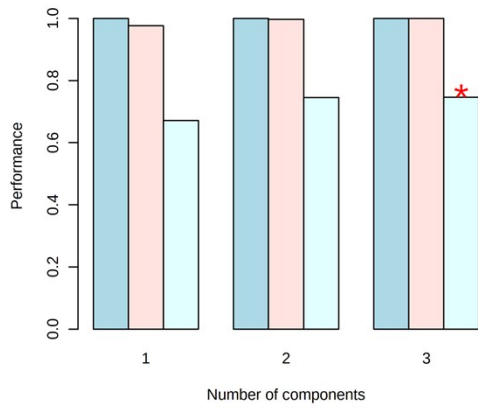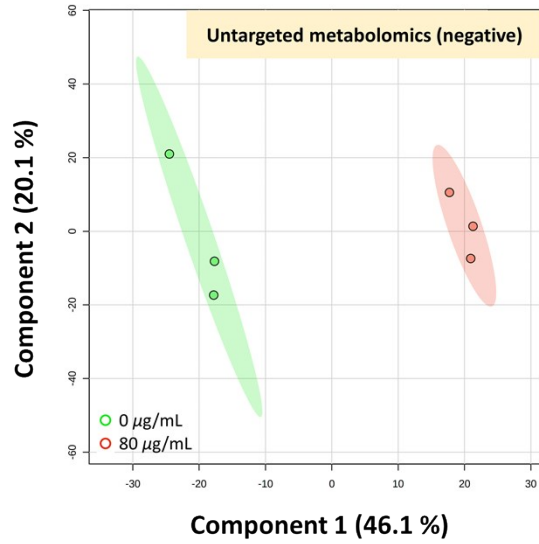

$R^2$ : 0.999,  $Q^2$ : 0.854

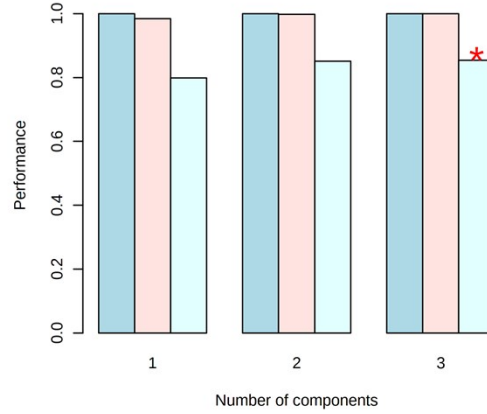

**Table S1.** MS parameters for untargeted lipidomics, large-scale targeted metabolomics, and untargeted metabolomics.

| <b>Thermo Scientific Q Exactive Plus</b> |                       | <b>Agilent 6460 Triple Quadrupole Mass Spectrometer</b> |                                 | <b>Agilent 6530 hybrid quadrupole Time of Flight Mass Spectrometer</b> |                    |
|------------------------------------------|-----------------------|---------------------------------------------------------|---------------------------------|------------------------------------------------------------------------|--------------------|
| <b>Untargeted lipidomics</b>             |                       | <b>Large-scale targeted metabolomics</b>                |                                 | <b>Untargeted metabolomics</b>                                         |                    |
| <b>MS1</b>                               |                       | ESI polarity                                            | Positive/negative ion-switching | ESI polarity                                                           | Positive, negative |
| ESI polarity                             | Positive, negative    | Polarity switching time                                 | 30 ms                           | MS resolution                                                          | 4 Ghz              |
| Sheath gas pressure                      | 60 arbitrary units    | Dwell time                                              | 3 ms                            | Capillary voltage                                                      | 3.5 kV             |
| Aux gas flow                             | 15 arbitrary units    | Capillary voltage                                       | 3.5 kV                          | MS1 range                                                              | 60-1000 m/z        |
| Sweep gas flow                           | 3 arbitrary units     | Drying gas                                              | 8 L/min                         | Nozzle voltage                                                         | 1000 V             |
| Spray voltage                            | 3.6 kV                | Nebulizer gas                                           | 35 psi                          | Fragmentor voltage                                                     | 135 V              |
| Capillary temperature                    | 275°C                 | Sheath gas temperature                                  | 350°C                           | Gas temperature                                                        | 325°C              |
| S-lens rf level                          | 55                    | Sheath gas flow                                         | 11 L/min                        | Drying gas                                                             | 8 L/min            |
| Aux gas heater temperature               | 450°C                 |                                                         |                                 | Nebulizer gas                                                          | 35 psi             |
| Ms1 mass range                           | 120-1200 m/z          |                                                         |                                 | Sheath gas temperature                                                 | 350°C              |
| Microscans                               | 1                     |                                                         |                                 | Sheath gas flow                                                        | 11 L/min           |
| Resolution                               | 70,000 FWHM (m/z 200) |                                                         |                                 | MS1 acquisition speed                                                  | 2 spectra/s        |
| Agc target                               | 1e6                   |                                                         |                                 |                                                                        |                    |
| Maximum it                               | 100 ms                |                                                         |                                 |                                                                        |                    |
| Number of scans                          | 1 spectra/s           |                                                         |                                 |                                                                        |                    |
| Spectrum data type                       | Profile               |                                                         |                                 |                                                                        |                    |
| <b>MS/MS (ddMS2)</b>                     |                       |                                                         |                                 |                                                                        |                    |
| Microscans                               | 1                     |                                                         |                                 |                                                                        |                    |
| Resolution                               | 17,500 FWHM (m/z 200) |                                                         |                                 |                                                                        |                    |
| Agc target                               | 1e5                   |                                                         |                                 |                                                                        |                    |
| Maximum it                               | 50 ms                 |                                                         |                                 |                                                                        |                    |
| Loop count                               | 4                     |                                                         |                                 |                                                                        |                    |
| Msx count                                | 1                     |                                                         |                                 |                                                                        |                    |
| TopN                                     | 4                     |                                                         |                                 |                                                                        |                    |
| Isolation window                         | 1.0 m/z               |                                                         |                                 |                                                                        |                    |

|                             |         |
|-----------------------------|---------|
| Isolation offset            | 0.0 m/z |
| Normalized collision energy | 20      |
| Spectrum data type          | Profile |

**Table S2.** The 212 targeted metabolites and their transitions for large-scale targeted metabolomics: a modified list from the method by Yuan et al. (*Nature Protocols*, 2012, **7**, 872-881).

| Number | Metabolite list                    | ESI | Precursor | Product | Number | Metabolite list          | ESI | Precursor | Product |
|--------|------------------------------------|-----|-----------|---------|--------|--------------------------|-----|-----------|---------|
| 1      | 1-Methyladenosine                  | +   | 281.8     | 150     | 107    | GMP                      | +   | 364       | 152     |
| 2      | 1-Methyl-Histidine                 | +   | 170.1     | 124     | 108    | GTP                      | -   | 522       | 424     |
| 3      | 2,3-Dihydroxybenzoic acid          | -   | 153       | 109     | 109    | Guanidoacetic acid       | -   | 116.001   | 74.3    |
| 4      | 2,3-Diphosphoglyceric acid         | -   | 265.1     | 167.1   | 110    | guanine                  | +   | 152.2     | 110     |
| 5      | 2-Aminooctanoic acid               | +   | 160       | 55.3    | 111    | guanosine                | +   | 284.1     | 135     |
| 6      | 2-Dehydro-D-gluconate              | -   | 193       | 103     | 112    | hexose-phosphate         | -   | 259       | 79      |
| 7      | 2-Hydroxy-2-methylbutanedioic acid | -   | 147.001   | 85.1    | 113    | histidine                | +   | 156.1     | 110.1   |
| 8      | 2-Isopropylmalic acid              | -   | 175.002   | 115     | 114    | histidinol               | +   | 142.1     | 95      |
| 9      | 2-Ketohexanoic acid                | -   | 129.005   | 101.3   | 115    | homocysteine             | +   | 136.12    | 90.1    |
| 10     | 2-Keto-isovalerate                 | -   | 115.05    | 71.05   | 116    | homoserine               | +   | 120.15    | 44.2    |
| 11     | 2-Oxobutanoate                     | -   | 101       | 57.2    | 117    | Hydroxyisocaproic acid   | -   | 131.006   | 85.1    |
| 12     | 3-Methylphenylacetic acid          | -   | 149.002   | 105     | 118    | Hydroxyphenylacetic acid | -   | 151.004   | 107     |
| 13     | 3-Phosphoglycerate                 | -   | 185       | 97      | 119    | hydroxyphenylpyruvate    | -   | 179.05    | 107     |
| 14     | 3-Phosphoserine                    | +   | 186       | 88      | 120    | hydroxyproline           | +   | 132       | 68.2    |
| 15     | 3-S-methylthiopropionate           | -   | 119.02    | 47      | 121    | hypoxanthine             | -   | 135       | 92      |
| 16     | 4-Aminobutyrate                    | +   | 104.01    | 69      | 122    | IDP                      | -   | 427       | 159     |
| 17     | 4-Pyridoxic acid                   | -   | 182.003   | 138     | 123    | Imidazoleacetic acid     | +   | 127.002   | 81      |
| 18     | 5-Methyl-THF                       | +   | 460.1     | 313.1   | 124    | IMP                      | +   | 349       | 137     |
| 19     | 6-Phospho-D-gluconate              | -   | 275       | 97      | 125    | indole                   | +   | 118       | 91      |
| 20     | 7-Methylguanosine                  | +   | 298.002   | 166     | 126    | Indole-3-carboxylic acid | -   | 160.002   | 116     |
| 21     | acetoacetate                       | -   | 101.05    | 57.2    | 127    | inosine                  | -   | 267       | 135     |
| 22     | Acetylcarnitine DL                 | +   | 204       | 85      | 128    | isocitrate               | -   | 191.02    | 117     |
| 23     | acetyl-CoA                         | +   | 810       | 303     | 129    | isoleucine               | +   | 132.1     | 86      |
| 24     | aconitate                          | -   | 173.05    | 85      | 130    | Kynurenic acid           | -   | 188       | 144     |
| 25     | adenine                            | +   | 136       | 119     | 131    | Kynurenine               | +   | 209       | 146     |
| 26     | adenosine                          | +   | 268.15    | 136.1   | 132    | lactate                  | -   | 89        | 43.2    |
| 27     | adenosine 5-phosphosulfate         | -   | 426       | 346     | 133    | leucine                  | +   | 132.1     | 86      |
| 28     | ADP                                | -   | 426.1     | 159     | 134    | lipoate                  | -   | 205       | 171     |
| 29     | alpha-ketoglutarate                | -   | 145       | 101     | 135    | lysine                   | +   | 147       | 67      |

|    |                     |   |         |        |     |                                  |   |         |        |
|----|---------------------|---|---------|--------|-----|----------------------------------|---|---------|--------|
| 30 | alanine             | + | 90.1    | 44.2   | 136 | malate                           | - | 133     | 115    |
| 31 | allantoate          | - | 175     | 132    | 137 | Maleic acid                      | - | 115.03  | 71.03  |
| 32 | allantoin           | - | 157.05  | 114    | 138 | methionine                       | + | 150.1   | 133    |
| 33 | Aminoadipic acid    | - | 160.001 | 116    | 139 | Methionine sulfoxide             | + | 166     | 74     |
| 34 | AMP                 | + | 348.15  | 136    | 140 | Methylcysteine                   | + | 136.02  | 119.02 |
| 35 | arginine            | + | 175.02  | 60     | 141 | Methylmalonic acid               | - | 117.002 | 73.1   |
| 36 | Ascorbic acid       | - | 175.001 | 87     | 142 | methylnicotinamide               | + | 137.001 | 94     |
| 37 | asparagine          | + | 133.1   | 74     | 143 | myo-inositol                     | - | 179     | 161    |
| 38 | aspartate           | + | 134     | 74     | 144 | N-acetyl-glucosamine-1-phosphate | - | 300     | 79     |
| 39 | betaine             | + | 118.02  | 58     | 145 | N-Acetyl-L-alanine               | - | 130     | 88     |
| 40 | betaine aldehyde    | + | 102     | 58     | 146 | N-acetyl-L-ornithine             | + | 175     | 115.1  |
| 41 | biotin              | + | 245.1   | 227    | 147 | N-Acetylputrescine               | + | 131     | 114    |
| 42 | Carbamoyl phosphate | - | 140     | 79     | 148 | NAD+                             | + | 664.1   | 428    |
| 43 | carnitine           | + | 162.1   | 103    | 149 | NADH                             | + | 666.1   | 514    |
| 44 | CDP                 | - | 402     | 384    | 150 | NADP+                            | + | 744.2   | 136    |
| 45 | CDP-choline         | - | 487     | 428    | 151 | NADPH                            | - | 744     | 408    |
| 46 | CDP-ethanolamine    | - | 445     | 273    | 152 | N-carbamoyl-L-aspartate          | - | 175.03  | 132    |
| 47 | cholesteryl sulfate | - | 465.2   | 97     | 153 | Ng,NG-dimethyl-L-arginine        | + | 203     | 70     |
| 48 | Cholic acid         | - | 407.2   | 345.2  | 154 | nicotinamide                     | + | 123.1   | 80     |
| 49 | choline             | + | 104     | 60     | 155 | Nicotinamide ribotide            | + | 335     | 123    |
| 50 | Citraconic acid     | - | 129.003 | 85.1   | 156 | nicotinate                       | - | 122     | 78     |
| 51 | citrate             | - | 191.05  | 87     | 157 | O-acetyl-L-serine                | + | 148     | 106    |
| 52 | CMP                 | + | 324     | 112    | 158 | octulose-monophosphate (O8P-O1P) | - | 319     | 97     |
| 53 | coenzyme A          | - | 766     | 408    | 159 | ornithine                        | + | 133     | 70     |
| 54 | creatine            | + | 132.003 | 90     | 160 | orotate                          | - | 155     | 111    |
| 55 | Creatinine          | + | 114     | 44.2   | 161 | orotidine-5-phosphate            | - | 367     | 323    |
| 56 | CTP                 | - | 482     | 384    | 162 | oxaloacetate                     | - | 131     | 87     |
| 57 | cyclic-AMP          | - | 328     | 134.05 | 163 | p-aminobenzoate                  | - | 136.05  | 92     |
| 58 | cystathionine       | + | 223     | 134    | 164 | pantothenate                     | - | 218     | 146    |
| 59 | cysteine            | + | 122.1   | 59.1   | 165 | phenylalanine                    | + | 166.1   | 103    |
| 60 | cytidine            | + | 244.1   | 112    | 166 | Phenyllactic acid                | - | 165.006 | 103.1  |
| 61 | cytosine            | + | 112.1   | 95     | 167 | phosphoenolpyruvate              | - | 167     | 79     |



|    |                               |   |         |       |     |                                   |   |         |       |
|----|-------------------------------|---|---------|-------|-----|-----------------------------------|---|---------|-------|
| 62 | dAMP                          | + | 332.1   | 136   | 168 | Phosphorylcholine                 | + | 184.001 | 125   |
| 63 | dATP                          | - | 490     | 159   | 169 | p-hydroxybenzoate                 | - | 137     | 93    |
| 64 | dCDP                          | - | 386     | 159   | 170 | proline                           | + | 116.1   | 70.1  |
| 65 | dCMP                          | + | 308     | 112   | 171 | purine                            | + | 121     | 94    |
| 66 | dCTP                          | - | 466     | 159   | 172 | pyridoxine                        | + | 170     | 134   |
| 67 | deoxyadenosine                | + | 252     | 136   | 173 | Pyroglutamic acid                 | - | 128     | 82.1  |
| 68 | Deoxycholic acid              | - | 391.202 | 345.2 | 174 | Pyrophosphate                     | - | 176.8   | 158.8 |
| 69 | deoxyribose-phosphate         | - | 213     | 79    | 175 | pyruvate                          | - | 87      | 43    |
| 70 | dephospho-CoA                 | + | 688     | 348   | 176 | quinolinate                       | - | 166     | 122   |
| 71 | D-erythrose-4-phosphate       | - | 199     | 97    | 177 | riboflavin                        | + | 377     | 243   |
| 72 | D-glucarate                   | - | 209     | 85    | 178 | ribose-phosphate                  | - | 229     | 79    |
| 73 | D-gluconate                   | - | 195     | 129   | 179 | S-adenosyl-L-homocysteine         | + | 385.1   | 136   |
| 74 | D-glyceraldehyde-3-phosphate  | - | 169.05  | 97    | 180 | S-adenosyl-L-methionine           | + | 399.1   | 250   |
| 75 | dGMP                          | + | 348.1   | 135   | 181 | serine                            | + | 106     | 60    |
| 76 | dGTP                          | - | 506.12  | 159   | 182 | shikimate                         | - | 173     | 93    |
| 77 | dihydroorotate                | - | 157     | 113   | 183 | shikimate-3-phosphate             | - | 253.1   | 97    |
| 78 | dihydroxy-acetone-phosphate   | - | 169     | 79    | 184 | sn-glycerol-3-phosphate           | - | 171     | 79    |
| 79 | dimethylglycine               | + | 104.02  | 58    | 185 | spermidine                        | + | 146     | 112   |
| 80 | DL-Pipecolic acid             | + | 130     | 84    | 186 | spermine                          | + | 203.1   | 129.1 |
| 81 | D-sedoheptulose-1-7-phosphate | - | 289     | 97    | 187 | succinate                         | - | 117     | 73    |
| 82 | dTDP                          | - | 401     | 159   | 188 | taurine                           | - | 124     | 80    |
| 83 | dTMP                          | + | 323     | 81    | 189 | Taurodeoxycholic acid             | - | 498.2   | 124   |
| 84 | dTTP                          | - | 481     | 159   | 190 | thiamine                          | + | 265     | 122   |
| 85 | dUMP                          | - | 307     | 195   | 191 | Thiamine pyrophosphate            | - | 423.1   | 302   |
| 86 | dUTP                          | - | 467     | 159   | 192 | thiamine-phosphate                | + | 345.2   | 122   |
| 87 | ethanolamine                  | + | 62.1    | 44.2  | 193 | threonine                         | + | 120     | 74    |
| 88 | FAD                           | + | 786     | 348   | 194 | thymidine                         | - | 241     | 125   |
| 89 | FMN                           | - | 455     | 213   | 195 | thymine                           | + | 127.1   | 110   |
| 90 | folate                        | + | 442     | 295   | 196 | trans, trans-farnesyl diphosphate | - | 381     | 79    |
| 91 | fructose-1,6-bisphosphate     | - | 339     | 97    | 197 | trehalose-6-Phosphate             | - | 421     | 79    |
| 92 | fumarate                      | - | 115     | 71    | 198 | tryptophan                        | + | 205     | 146   |
| 93 | GDP                           | - | 442     | 159   | 199 | tyrosine                          | + | 182.1   | 77    |

|     |                       |   |        |      |     |                          |   |         |      |
|-----|-----------------------|---|--------|------|-----|--------------------------|---|---------|------|
| 94  | Geranyl-PP            | - | 313    | 79   | 200 | UDP                      | - | 403     | 159  |
| 95  | glucono-D-lactone     | - | 177    | 129  | 201 | UDP-D-glucose            | - | 565     | 323  |
| 96  | glucosamine           | + | 180    | 162  | 202 | UDP-D-glucuronate        | - | 579     | 403  |
| 97  | glucose-6-phosphate   | - | 259.02 | 199  | 203 | UDP-N-acetyl-glucosamine | - | 606     | 385  |
| 98  | glutamate             | + | 148.1  | 84.1 | 204 | UMP                      | + | 325     | 97   |
| 99  | glutamine             | + | 147.1  | 84.1 | 205 | uracil                   | - | 111.05  | 42.1 |
| 100 | glutathione           | + | 308.1  | 162  | 206 | Urea                     | + | 61.1    | 44.2 |
| 101 | glutathione disulfide | + | 613    | 231  | 207 | Uric acid                | - | 167.001 | 124  |
| 102 | glycerate             | - | 105    | 75   | 208 | uridine                  | - | 243     | 200  |
| 103 | Glycerophosphocholine | + | 258.1  | 104  | 209 | valine                   | + | 118.1   | 55.2 |
| 104 | Glycine               | + | 169    | 134  | 210 | xanthine                 | - | 151     | 108  |
| 105 | glycolate             | - | 75     | 45.2 | 211 | xanthosine               | - | 283     | 151  |
| 106 | glyoxylate            | - | 73     | 45   | 212 | Xanthurenic acid         | - | 204.001 | 160  |

**Table S3.** Data processing parameters for untargeted lipidomics (MSDIAL) and untargeted metabolomics (XCMS).

| <b>Untargeted lipidomics (MS-DIAL)</b> |                                                                                                                                                                                                                                                                      |
|----------------------------------------|----------------------------------------------------------------------------------------------------------------------------------------------------------------------------------------------------------------------------------------------------------------------|
| Data collection                        |                                                                                                                                                                                                                                                                      |
| MS1 tolerance                          | 0.001 Da                                                                                                                                                                                                                                                             |
| MS2 tolerance                          | 0.05 Da                                                                                                                                                                                                                                                              |
| Retention time begin                   | 0 min                                                                                                                                                                                                                                                                |
| Retention time end                     | 16 min                                                                                                                                                                                                                                                               |
| Mass range begin                       | 120 Da                                                                                                                                                                                                                                                               |
| Mass range end                         | 1200 Da                                                                                                                                                                                                                                                              |
| Maximum charged number                 | 2                                                                                                                                                                                                                                                                    |
| Peak detection                         |                                                                                                                                                                                                                                                                      |
| Minimum peak height                    | 10000 amplitude                                                                                                                                                                                                                                                      |
| Mass slice width                       | 0.1 Da                                                                                                                                                                                                                                                               |
| Smoothing method                       | Linear weighted moving average                                                                                                                                                                                                                                       |
| Smoothing level                        | 3 scan                                                                                                                                                                                                                                                               |
| Minimum peak width                     | 5 scan                                                                                                                                                                                                                                                               |
| MS2 Dec                                |                                                                                                                                                                                                                                                                      |
| Sigma window value                     | 0.1                                                                                                                                                                                                                                                                  |
| MS/MS abundance cut off                | 0 amplitude                                                                                                                                                                                                                                                          |
| Exclude after precursor ion            | checked                                                                                                                                                                                                                                                              |
| Keep the isotopic ions until           | 0.5 Da                                                                                                                                                                                                                                                               |
| Identification                         |                                                                                                                                                                                                                                                                      |
| Retention time tolerance               | 100 min                                                                                                                                                                                                                                                              |
| Accurate mass tolerance (MS1)          | 0.01 Da                                                                                                                                                                                                                                                              |
| Accurate mass tolerance (MS2)          | 0.05 Da                                                                                                                                                                                                                                                              |
| Identification score cut off           | 80%                                                                                                                                                                                                                                                                  |
| Adduct                                 |                                                                                                                                                                                                                                                                      |
| Positive:                              | [M+H] <sup>+</sup> , [M+NH <sub>4</sub> ] <sup>+</sup> , [M+Na] <sup>+</sup> , [M+ACN+H] <sup>+</sup> , [M+H-H <sub>2</sub> O] <sup>+</sup> , [M+H-2H <sub>2</sub> O] <sup>+</sup> , [2M+H] <sup>+</sup> , [2M+NH <sub>4</sub> ] <sup>+</sup> , [2M+Na] <sup>+</sup> |
| Negative:                              | [M-H] <sup>-</sup> , [M-H <sub>2</sub> O-H] <sup>-</sup> , [M+Cl] <sup>-</sup> , [M+Hac-H] <sup>-</sup> , [M+CH <sub>3</sub> COONa-H] <sup>-</sup> , [2M-H] <sup>-</sup>                                                                                             |
| Alignment                              |                                                                                                                                                                                                                                                                      |
| Reference file                         | one of QC sample file                                                                                                                                                                                                                                                |
| Retention time tolerance               | 0.05 min                                                                                                                                                                                                                                                             |
| MS1 tolerance                          | 0.015 Da                                                                                                                                                                                                                                                             |

Blank filter: sample max / blank average

3 fold change

**Untargeted metabolomics (XCMS)**

|                           | Positive ESI | Negative ESI |
|---------------------------|--------------|--------------|
| Method                    | centWave     | centWave     |
| m/z tolerance (ppm)       | 20           | 20           |
| minimum peak width        | 7.75         | 7.3          |
| maximum peak width        | 33.75        | 15           |
| mzdiff                    | -0.001       | -0.001       |
| signal-to-noise threshold | 6            | 6            |
| noise filter              | 0            | 0            |
| prefilter peaks           | 3            | 3            |
| prefilter intensity       | 100          | 100          |
| Integration method        | 1            | 1            |

**Table S4.** Lists of annotated lipids in positive and negative ESI lipidomics analysis: bond type level and/or fatty acyl/alkyl level.

| Positive ESI |                  |                        |        |                 |                    |        |                     |                      |
|--------------|------------------|------------------------|--------|-----------------|--------------------|--------|---------------------|----------------------|
| Number       | Metabolite name  | Adduct type            | Number | Metabolite name | Adduct type        | Number | Metabolite name     | Adduct type          |
| 1            | Cer 18:1;2O/16:0 | [M+H] <sup>+</sup>     | 142    | PC O-44:4_1     | [M+H] <sup>+</sup> | 283    | TG 14:0_16:0_16:1_1 | [M+NH4] <sup>+</sup> |
| 2            | Cer 18:2;2O/16:0 | [M+H-H2O] <sup>+</sup> | 143    | PC O-44:4_2     | [M+H] <sup>+</sup> | 284    | TG 14:0_16:0_16:1_2 | [M+NH4] <sup>+</sup> |
| 3            | Cer 18:1;2O/18:0 | [M+H] <sup>+</sup>     | 144    | PC O-44:5       | [M+H] <sup>+</sup> | 285    | TG 14:0_16:0_17:0_1 | [M+NH4] <sup>+</sup> |
| 4            | Cer 18:1;2O/20:0 | [M+H] <sup>+</sup>     | 145    | PC O-44:6       | [M+H] <sup>+</sup> | 286    | TG 14:0_16:0_17:0_2 | [M+NH4] <sup>+</sup> |
| 5            | Cer 18:1;2O/22:0 | [M+H] <sup>+</sup>     | 146    | PC O-46:6_1     | [M+H] <sup>+</sup> | 287    | TG 14:0_16:0_18:1_1 | [M+NH4] <sup>+</sup> |
| 6            | Cer 18:1;2O/22:1 | [M+H-H2O] <sup>+</sup> | 147    | PC O-46:6_2     | [M+H] <sup>+</sup> | 288    | TG 14:0_16:0_18:1_2 | [M+NH4] <sup>+</sup> |
| 7            | Cer 18:1;2O/23:0 | [M+H] <sup>+</sup>     | 148    | PC O-48:6       | [M+H] <sup>+</sup> | 289    | TG 14:0_16:0_22:5   | [M+NH4] <sup>+</sup> |
| 8            | Cer 18:1;2O/24:0 | [M+H] <sup>+</sup>     | 149    | PE 14:0_16:1    | [M+H] <sup>+</sup> | 290    | TG 14:0_16:0_22:6   | [M+NH4] <sup>+</sup> |
| 9            | Cer 18:1;2O/24:1 | [M+H] <sup>+</sup>     | 150    | PE 16:0_16:0    | [M+H] <sup>+</sup> | 291    | TG 14:0_16:0_24:0   | [M+NH4] <sup>+</sup> |
| 10           | Cer 18:2;2O/24:1 | [M+H] <sup>+</sup>     | 151    | PE 16:0_16:1    | [M+H] <sup>+</sup> | 292    | TG 14:0_16:0_26:0   | [M+NH4] <sup>+</sup> |
| 11           | Cer 18:1;2O/26:1 | [M+H] <sup>+</sup>     | 152    | PE 16:1_16:1    | [M+H] <sup>+</sup> | 293    | TG 14:0_16:1_18:1_1 | [M+NH4] <sup>+</sup> |
| 12           | DG 16:0_16:0     | [M+NH4] <sup>+</sup>   | 153    | PE 16:0_17:1    | [M+H] <sup>+</sup> | 294    | TG 14:0_16:1_18:1_2 | [M+NH4] <sup>+</sup> |
| 13           | DG 14:0_18:1     | [M+NH4] <sup>+</sup>   | 154    | PE 16:1_17:1    | [M+H] <sup>+</sup> | 295    | TG 14:0_16:1_18:1_3 | [M+NH4] <sup>+</sup> |
| 14           | DG 16:0_18:1     | [M+NH4] <sup>+</sup>   | 155    | PE 16:0_18:0    | [M+H] <sup>+</sup> | 296    | TG 14:0_16:1_22:5   | [M+NH4] <sup>+</sup> |
| 15           | DG 16:1_18:1     | [M+NH4] <sup>+</sup>   | 156    | PE 16:0_18:1    | [M+H] <sup>+</sup> | 297    | TG 14:0_18:0_20:0   | [M+NH4] <sup>+</sup> |
| 16           | DG 16:0_20:1     | [M+NH4] <sup>+</sup>   | 157    | PE 16:1_18:1    | [M+H] <sup>+</sup> | 298    | TG 14:0_25:0_16:1   | [M+NH4] <sup>+</sup> |
| 17           | DG 18:1_18:1     | [M+NH4] <sup>+</sup>   | 158    | PE 16:1_18:2_1  | [M+H] <sup>+</sup> | 299    | TG 14:1_14:1_14:1   | [M+NH4] <sup>+</sup> |
| 18           | DG 18:0_18:2     | [M+NH4] <sup>+</sup>   | 159    | PE 16:1_18:2_2  | [M+H] <sup>+</sup> | 300    | TG 14:1_14:1_16:1   | [M+NH4] <sup>+</sup> |
| 19           | DG 18:1_18:2     | [M+NH4] <sup>+</sup>   | 160    | PE 17:0_18:1_1  | [M+H] <sup>+</sup> | 301    | TG 14:1_16:1_16:1   | [M+NH4] <sup>+</sup> |
| 20           | DG 16:0_20:3     | [M+NH4] <sup>+</sup>   | 161    | PE 17:0_18:1_2  | [M+H] <sup>+</sup> | 302    | TG 14:1_16:1_18:1   | [M+NH4] <sup>+</sup> |
| 21           | DG 16:0_20:4     | [M+NH4] <sup>+</sup>   | 162    | PE 17:1_18:1    | [M+H] <sup>+</sup> | 303    | TG 14:1_17:1_18:1   | [M+NH4] <sup>+</sup> |
| 22           | DG 18:0_20:1     | [M+NH4] <sup>+</sup>   | 163    | PE 18:0_18:1    | [M+H] <sup>+</sup> | 304    | TG 15:0_14:1_16:1   | [M+NH4] <sup>+</sup> |
| 23           | DG 18:1_20:1     | [M+NH4] <sup>+</sup>   | 164    | PE 18:1_18:1_1  | [M+H] <sup>+</sup> | 305    | TG 15:0_15:1_17:1_1 | [M+NH4] <sup>+</sup> |
| 24           | DG 18:0_20:2     | [M+NH4] <sup>+</sup>   | 165    | PE 18:1_18:1_2  | [M+H] <sup>+</sup> | 306    | TG 15:0_15:1_17:1_2 | [M+NH4] <sup>+</sup> |
| 25           | DG 18:1_20:2     | [M+NH4] <sup>+</sup>   | 166    | PE 18:2_18:2    | [M+H] <sup>+</sup> | 307    | TG 15:0_16:0_16:1_1 | [M+NH4] <sup>+</sup> |
| 26           | DG 18:0_20:3     | [M+NH4] <sup>+</sup>   | 167    | PE 16:0_20:4    | [M+H] <sup>+</sup> | 308    | TG 15:0_16:0_17:0   | [M+NH4] <sup>+</sup> |
| 27           | DG 16:0_22:5     | [M+NH4] <sup>+</sup>   | 168    | PE 16:1_20:4    | [M+H] <sup>+</sup> | 309    | TG 15:0_16:0_18:0_1 | [M+NH4] <sup>+</sup> |
| 28           | DG 16:0_24:1     | [M+NH4] <sup>+</sup>   | 169    | PE 16:0_20:5    | [M+H] <sup>+</sup> | 310    | TG 15:0_16:0_18:0_2 | [M+NH4] <sup>+</sup> |
| 29           | DG 18:0_22:4     | [M+NH4] <sup>+</sup>   | 170    | PE 16:1_20:5    | [M+H] <sup>+</sup> | 311    | TG 15:0_16:0_18:1_1 | [M+NH4] <sup>+</sup> |
| 30           | DG 18:0_22:5     | [M+NH4] <sup>+</sup>   | 171    | PE 18:0_19:1    | [M+H] <sup>+</sup> | 312    | TG 15:0_16:0_18:1_2 | [M+NH4] <sup>+</sup> |

|    |                            |                      |     |                |                    |     |                     |                      |
|----|----------------------------|----------------------|-----|----------------|--------------------|-----|---------------------|----------------------|
| 31 | DG 18:1_22:5               | [M+NH4] <sup>+</sup> | 172 | PE 18:1_19:1   | [M+H] <sup>+</sup> | 313 | TG 15:0_16:0_24:0   | [M+NH4] <sup>+</sup> |
| 32 | DG 18:1_24:1               | [M+NH4] <sup>+</sup> | 173 | PE 18:0_20:1   | [M+H] <sup>+</sup> | 314 | TG 15:0_16:1_18:1   | [M+NH4] <sup>+</sup> |
| 33 | HexCer<br>18:1;2O/16:0     | [M+H] <sup>+</sup>   | 174 | PE 18:1_20:1   | [M+H] <sup>+</sup> | 315 | TG 15:0_17:1_17:1   | [M+NH4] <sup>+</sup> |
| 34 | HexCer<br>18:1;2O/22:0;O   | [M+H] <sup>+</sup>   | 175 | PE 18:0_20:3   | [M+H] <sup>+</sup> | 316 | TG 16:0_14:1_16:1_1 | [M+NH4] <sup>+</sup> |
| 35 | HexCer<br>18:1;2O/24:0;O   | [M+H] <sup>+</sup>   | 176 | PE 18:1_20:3   | [M+H] <sup>+</sup> | 317 | TG 16:0_14:1_16:1_2 | [M+NH4] <sup>+</sup> |
| 36 | HexCer<br>18:1;2O/24:1;O_1 | [M+H] <sup>+</sup>   | 177 | PE 18:0_20:4   | [M+H] <sup>+</sup> | 318 | TG 16:0_16:0_16:0   | [M+NH4] <sup>+</sup> |
| 37 | HexCer<br>18:1;2O/24:1;O_2 | [M+H] <sup>+</sup>   | 178 | PE 16:0_22:4   | [M+H] <sup>+</sup> | 319 | TG 16:0_16:0_18:0_1 | [M+NH4] <sup>+</sup> |
| 38 | LPC 14:0                   | [M+H] <sup>+</sup>   | 179 | PE 18:1_20:4   | [M+H] <sup>+</sup> | 320 | TG 16:0_16:0_18:0_2 | [M+NH4] <sup>+</sup> |
| 39 | LPC 16:0                   | [M+H] <sup>+</sup>   | 180 | PE 18:0_20:5   | [M+H] <sup>+</sup> | 321 | TG 16:0_16:0_18:1   | [M+NH4] <sup>+</sup> |
| 40 | LPC 16:1                   | [M+H] <sup>+</sup>   | 181 | PE 16:1_22:6   | [M+H] <sup>+</sup> | 322 | TG 16:0_16:1_17:1   | [M+NH4] <sup>+</sup> |
| 41 | LPC 18:1/0:0               | [M+H] <sup>+</sup>   | 182 | PE 22:0_18:1   | [M+H] <sup>+</sup> | 323 | TG 16:0_16:1_18:1_1 | [M+NH4] <sup>+</sup> |
| 42 | LPC 20:0/0:0               | [M+H] <sup>+</sup>   | 183 | PE 18:1_22:1   | [M+H] <sup>+</sup> | 324 | TG 16:0_16:1_18:1_2 | [M+NH4] <sup>+</sup> |
| 43 | LPC 20:1                   | [M+H] <sup>+</sup>   | 184 | PE 18:0_22:4   | [M+H] <sup>+</sup> | 325 | TG 16:0_16:1_20:5   | [M+NH4] <sup>+</sup> |
| 44 | LPC 20:1/0:0               | [M+H] <sup>+</sup>   | 185 | PE 18:0_22:5_1 | [M+H] <sup>+</sup> | 326 | TG 16:0_16:1_22:6   | [M+NH4] <sup>+</sup> |
| 45 | LPC 22:0/0:0               | [M+H] <sup>+</sup>   | 186 | PE 18:0_22:5_2 | [M+H] <sup>+</sup> | 327 | TG 16:0_17:0_18:0   | [M+NH4] <sup>+</sup> |
| 46 | LPC 22:1/0:0               | [M+H] <sup>+</sup>   | 187 | PE 18:0_22:6   | [M+H] <sup>+</sup> | 328 | TG 16:0_17:0_18:1_1 | [M+NH4] <sup>+</sup> |
| 47 | LPC 24:0/0:0               | [M+H] <sup>+</sup>   | 188 | PE 18:1_22:6   | [M+H] <sup>+</sup> | 329 | TG 16:0_17:0_18:1_2 | [M+NH4] <sup>+</sup> |
| 48 | LPC 24:1/0:0               | [M+H] <sup>+</sup>   | 189 | PE 22:1_20:4   | [M+H] <sup>+</sup> | 330 | TG 16:0_18:0_18:1   | [M+NH4] <sup>+</sup> |
| 49 | LPC 26:1/0:0               | [M+H] <sup>+</sup>   | 190 | PE 20:1_22:6   | [M+H] <sup>+</sup> | 331 | TG 16:0_18:0_18:1_2 | [M+NH4] <sup>+</sup> |
| 50 | LPE 18:0                   | [M+H] <sup>+</sup>   | 191 | PE 18:1_26:1   | [M+H] <sup>+</sup> | 332 | TG 16:0_18:0_20:4   | [M+NH4] <sup>+</sup> |
| 51 | LPE 18:1                   | [M+H] <sup>+</sup>   | 192 | PE P-16:0_14:0 | [M+H] <sup>+</sup> | 333 | TG 16:0_18:1_18:1   | [M+NH4] <sup>+</sup> |
| 52 | LPE 24:0                   | [M+H] <sup>+</sup>   | 193 | PE P-14:0_16:1 | [M+H] <sup>+</sup> | 334 | TG 16:0_18:1_18:2_1 | [M+NH4] <sup>+</sup> |
| 53 | LPE O-16:1                 | [M+H] <sup>+</sup>   | 194 | PE P-16:0_16:1 | [M+H] <sup>+</sup> | 335 | TG 16:0_18:1_18:2_2 | [M+NH4] <sup>+</sup> |
| 54 | LPE O-18:1                 | [M+H] <sup>+</sup>   | 195 | PE P-18:1_14:1 | [M+H] <sup>+</sup> | 336 | TG 16:0_18:1_20:1_1 | [M+NH4] <sup>+</sup> |
| 55 | LPE O-18:2                 | [M+H] <sup>+</sup>   | 196 | PE P-17:0_16:1 | [M+H] <sup>+</sup> | 337 | TG 16:0_18:1_20:1_2 | [M+NH4] <sup>+</sup> |
| 56 | LPE O-20:1                 | [M+H] <sup>+</sup>   | 197 | PE P-16:0_17:1 | [M+H] <sup>+</sup> | 338 | TG 16:0_18:1_22:1   | [M+NH4] <sup>+</sup> |
| 57 | LPE O-22:1                 | [M+H] <sup>+</sup>   | 198 | PE P-18:0_16:0 | [M+H] <sup>+</sup> | 339 | TG 16:0_18:1_22:4_1 | [M+NH4] <sup>+</sup> |
| 58 | LPE O-24:2                 | [M+H] <sup>+</sup>   | 199 | PE P-16:0_18:1 | [M+H] <sup>+</sup> | 340 | TG 16:0_18:1_22:4_2 | [M+NH4] <sup>+</sup> |
| 59 | PC 14:0_14:0               | [M+H] <sup>+</sup>   | 200 | PE P-18:1_16:1 | [M+H] <sup>+</sup> | 341 | TG 16:0_18:1_22:5   | [M+NH4] <sup>+</sup> |

|    |                |                    |     |                  |                    |     |                     |                                   |
|----|----------------|--------------------|-----|------------------|--------------------|-----|---------------------|-----------------------------------|
| 60 | PC 14:0 16:1   | [M+H] <sup>+</sup> | 201 | PE P-16:0 18:2   | [M+H] <sup>+</sup> | 342 | TG 16:0 18:1 22:6   | [M+NH <sub>4</sub> ] <sup>+</sup> |
| 61 | PC 16:0 16:1   | [M+H] <sup>+</sup> | 202 | PE P-16:0 18:3   | [M+H] <sup>+</sup> | 343 | TG 16:0 18:1 24:1   | [M+NH <sub>4</sub> ] <sup>+</sup> |
| 62 | PC 16:1 16:1   | [M+H] <sup>+</sup> | 203 | PE P-14:0 20:4   | [M+H] <sup>+</sup> | 344 | TG 16:0 18:1 26:1   | [M+NH <sub>4</sub> ] <sup>+</sup> |
| 63 | PC 16:0 17:1   | [M+H] <sup>+</sup> | 204 | PE P-18:1 17:0   | [M+H] <sup>+</sup> | 345 | TG 16:0 19:1 20:1   | [M+NH <sub>4</sub> ] <sup>+</sup> |
| 64 | PC 16:0 18:0   | [M+H] <sup>+</sup> | 205 | PE P-17:0 18:1   | [M+H] <sup>+</sup> | 346 | TG 16:0 20:0 18:1   | [M+NH <sub>4</sub> ] <sup>+</sup> |
| 65 | PC 16:0 18:1   | [M+H] <sup>+</sup> | 206 | PE P-18:1 17:1   | [M+H] <sup>+</sup> | 347 | TG 16:0 22:5 22:6   | [M+NH <sub>4</sub> ] <sup>+</sup> |
| 66 | PC 16:1 18:1   | [M+H] <sup>+</sup> | 207 | PE P-18:0 18:1   | [M+H] <sup>+</sup> | 348 | TG 16:0 23:0 18:1   | [M+NH <sub>4</sub> ] <sup>+</sup> |
| 67 | PC 16:1 18:2 1 | [M+H] <sup>+</sup> | 208 | PE P-18:1 18:1   | [M+H] <sup>+</sup> | 349 | TG 16:0 24:0 16:1   | [M+NH <sub>4</sub> ] <sup>+</sup> |
| 68 | PC 16:1 18:2 2 | [M+H] <sup>+</sup> | 209 | PE P-18:0 18:2   | [M+H] <sup>+</sup> | 350 | TG 16:0 24:0 18:1   | [M+NH <sub>4</sub> ] <sup>+</sup> |
| 69 | PC 17:0 18:1   | [M+H] <sup>+</sup> | 210 | PE P-16:0 20:3 2 | [M+H] <sup>+</sup> | 351 | TG 16:0 24:1 26:1   | [M+NH <sub>4</sub> ] <sup>+</sup> |
| 70 | PC 17:1 18:1   | [M+H] <sup>+</sup> | 211 | PE P-16:0 20:4   | [M+H] <sup>+</sup> | 352 | TG 16:0 26:0 18:1   | [M+NH <sub>4</sub> ] <sup>+</sup> |
| 71 | PC 16:0 20:1   | [M+H] <sup>+</sup> | 212 | PE P-16:0 20:5   | [M+H] <sup>+</sup> | 353 | TG 16:1 16:1 18:1   | [M+NH <sub>4</sub> ] <sup>+</sup> |
| 72 | PC 18:1 18:1   | [M+H] <sup>+</sup> | 213 | PE P-22:1 16:0   | [M+H] <sup>+</sup> | 354 | TG 16:1 16:1 18:2   | [M+NH <sub>4</sub> ] <sup>+</sup> |
| 73 | PC 18:1 18:2 1 | [M+H] <sup>+</sup> | 214 | PE P-16:0 22:2   | [M+H] <sup>+</sup> | 355 | TG 16:1 17:1 18:1 2 | [M+NH <sub>4</sub> ] <sup>+</sup> |
| 74 | PC 18:1 18:2 2 | [M+H] <sup>+</sup> | 215 | PE P-20:1 18:2   | [M+H] <sup>+</sup> | 356 | TG 16:1 17:1 18:2   | [M+NH <sub>4</sub> ] <sup>+</sup> |
| 75 | PC 16:1 20:3   | [M+H] <sup>+</sup> | 216 | PE P-18:0 20:3 1 | [M+H] <sup>+</sup> | 357 | TG 16:1 18:1 18:2   | [M+NH <sub>4</sub> ] <sup>+</sup> |
| 76 | PC 16:0 20:4   | [M+H] <sup>+</sup> | 217 | PE P-18:0 20:3 2 | [M+H] <sup>+</sup> | 358 | TG 16:1 18:1 18:3   | [M+NH <sub>4</sub> ] <sup>+</sup> |
| 77 | PC 14:0 22:6   | [M+H] <sup>+</sup> | 218 | PE P-18:1 20:3   | [M+H] <sup>+</sup> | 359 | TG 16:1 18:1 20:1   | [M+NH <sub>4</sub> ] <sup>+</sup> |
| 78 | PC 18:1 19:1   | [M+H] <sup>+</sup> | 219 | PE P-18:0 20:4   | [M+H] <sup>+</sup> | 360 | TG 16:1 18:1 20:4   | [M+NH <sub>4</sub> ] <sup>+</sup> |
| 79 | PC 18:1 20:1   | [M+H] <sup>+</sup> | 220 | PE P-16:0 22:4   | [M+H] <sup>+</sup> | 361 | TG 16:1 18:1 22:5   | [M+NH <sub>4</sub> ] <sup>+</sup> |
| 80 | PC 18:1 20:2 1 | [M+H] <sup>+</sup> | 221 | PE P-18:1 20:4   | [M+H] <sup>+</sup> | 362 | TG 16:1 18:1 26:1   | [M+NH <sub>4</sub> ] <sup>+</sup> |
| 81 | PC 18:1 20:2 2 | [M+H] <sup>+</sup> | 222 | PE P-16:0 22:5   | [M+H] <sup>+</sup> | 363 | TG 16:1 19:1 24:1   | [M+NH <sub>4</sub> ] <sup>+</sup> |
| 82 | PC 18:1 20:3   | [M+H] <sup>+</sup> | 223 | PE P-18:1 20:5   | [M+H] <sup>+</sup> | 364 | TG 17:0 16:1 18:1   | [M+NH <sub>4</sub> ] <sup>+</sup> |
| 83 | PC 18:0 20:4   | [M+H] <sup>+</sup> | 224 | PE P-21:0 18:1   | [M+H] <sup>+</sup> | 365 | TG 17:0 18:0 18:1 1 | [M+NH <sub>4</sub> ] <sup>+</sup> |
| 84 | PC 16:0 22:4   | [M+H] <sup>+</sup> | 225 | PE P-24:1 16:0   | [M+H] <sup>+</sup> | 366 | TG 17:0 18:0 18:1 2 | [M+NH <sub>4</sub> ] <sup>+</sup> |
| 85 | PC 18:1 20:4   | [M+H] <sup>+</sup> | 226 | PE P-24:0 16:1   | [M+H] <sup>+</sup> | 367 | TG 17:0 18:1 18:1   | [M+NH <sub>4</sub> ] <sup>+</sup> |
| 86 | PC 16:0 22:5   | [M+H] <sup>+</sup> | 227 | PE P-22:1 18:1   | [M+H] <sup>+</sup> | 368 | TG 17:0 18:1 20:4   | [M+NH <sub>4</sub> ] <sup>+</sup> |
| 87 | PC 18:1 20:5   | [M+H] <sup>+</sup> | 228 | PE P-22:1 18:2   | [M+H] <sup>+</sup> | 369 | TG 17:0 18:1 22:5   | [M+NH <sub>4</sub> ] <sup>+</sup> |
| 88 | PC 16:0 22:6   | [M+H] <sup>+</sup> | 229 | PE P-20:1 20:3   | [M+H] <sup>+</sup> | 370 | TG 17:1 18:1 18:1   | [M+NH <sub>4</sub> ] <sup>+</sup> |
| 89 | PC 24:0 16:1   | [M+H] <sup>+</sup> | 230 | PE P-20:0 20:4   | [M+H] <sup>+</sup> | 371 | TG 17:1 18:1 18:2   | [M+NH <sub>4</sub> ] <sup>+</sup> |
| 90 | PC 16:0 24:1   | [M+H] <sup>+</sup> | 231 | PE P-18:0 22:4   | [M+H] <sup>+</sup> | 372 | TG 17:1 18:1 22:5   | [M+NH <sub>4</sub> ] <sup>+</sup> |
| 91 | PC 20:1 20:3   | [M+H] <sup>+</sup> | 232 | PE P-18:0 22:5 1 | [M+H] <sup>+</sup> | 373 | TG 17:1 18:1 26:1   | [M+NH <sub>4</sub> ] <sup>+</sup> |
| 92 | PC 18:1 22:5 1 | [M+H] <sup>+</sup> | 233 | PE P-18:0 22:5 2 | [M+H] <sup>+</sup> | 374 | TG 18:0 18:1 20:3   | [M+NH <sub>4</sub> ] <sup>+</sup> |
| 93 | PC 18:1 22:5 2 | [M+H] <sup>+</sup> | 234 | PE P-18:0 22:6 2 | [M+H] <sup>+</sup> | 375 | TG 18:0 18:1 22:3   | [M+NH <sub>4</sub> ] <sup>+</sup> |

|     |              |                    |     |                     |                      |     |                     |                      |
|-----|--------------|--------------------|-----|---------------------|----------------------|-----|---------------------|----------------------|
| 94  | PC 18:0 22:6 | [M+H] <sup>+</sup> | 235 | PE P-18:1 22:6      | [M+H] <sup>+</sup>   | 376 | TG 18:0 18:1 22:4   | [M+NH4] <sup>+</sup> |
| 95  | PC 18:1 22:6 | [M+H] <sup>+</sup> | 236 | PE P-24:1 17:1      | [M+H] <sup>+</sup>   | 377 | TG 18:0 18:1 22:5   | [M+NH4] <sup>+</sup> |
| 96  | PC 26:0 16:1 | [M+H] <sup>+</sup> | 237 | PE P-24:1 18:1      | [M+H] <sup>+</sup>   | 378 | TG 18:0 18:1 22:6   | [M+NH4] <sup>+</sup> |
| 97  | PC 42:2      | [M+H] <sup>+</sup> | 238 | PE P-22:1 20:4      | [M+H] <sup>+</sup>   | 379 | TG 18:0 20:1 20:4   | [M+NH4] <sup>+</sup> |
| 98  | PC 18:1 26:1 | [M+H] <sup>+</sup> | 239 | PE P-22:1 20:5      | [M+H] <sup>+</sup>   | 380 | TG 18:0 20:1 22:4   | [M+NH4] <sup>+</sup> |
| 99  | PC O-29:0    | [M+H] <sup>+</sup> | 240 | PE P-20:1 22:5      | [M+H] <sup>+</sup>   | 381 | TG 18:0 20:1 22:5   | [M+NH4] <sup>+</sup> |
| 100 | PC O-30:0    | [M+H] <sup>+</sup> | 241 | PE P-20:0 22:6      | [M+H] <sup>+</sup>   | 382 | TG 18:0 21:1 26:1   | [M+NH4] <sup>+</sup> |
| 101 | PC O-30:1    | [M+H] <sup>+</sup> | 242 | PE P-24:1 20:4      | [M+H] <sup>+</sup>   | 383 | TG 18:1 18:1 18:1 1 | [M+NH4] <sup>+</sup> |
| 102 | PC O-32:0    | [M+H] <sup>+</sup> | 243 | PE P-24:1 20:5      | [M+H] <sup>+</sup>   | 384 | TG 18:1 18:1 18:1 2 | [M+NH4] <sup>+</sup> |
| 103 | PC O-32:1    | [M+H] <sup>+</sup> | 244 | PE P-22:1 22:5      | [M+H] <sup>+</sup>   | 385 | TG 18:1 18:1 18:1 3 | [M+NH4] <sup>+</sup> |
| 104 | PC O-33:1    | [M+H] <sup>+</sup> | 245 | PE P-22:1 22:6      | [M+H] <sup>+</sup>   | 386 | TG 18:1 18:1 18:2   | [M+NH4] <sup>+</sup> |
| 105 | PC O-33:2    | [M+H] <sup>+</sup> | 246 | PE P-24:1 22:5      | [M+H] <sup>+</sup>   | 387 | TG 18:1 18:1 19:1 1 | [M+NH4] <sup>+</sup> |
| 106 | PC O-36:0    | [M+H] <sup>+</sup> | 247 | PE P-24:1 22:6      | [M+H] <sup>+</sup>   | 388 | TG 18:1 18:1 19:1 2 | [M+NH4] <sup>+</sup> |
| 107 | PC O-36:1    | [M+H] <sup>+</sup> | 248 | PI 32:2             | [M+NH4] <sup>+</sup> | 389 | TG 18:1 18:1 20:1   | [M+NH4] <sup>+</sup> |
| 108 | PC O-36:2    | [M+H] <sup>+</sup> | 249 | PI 34:2 1           | [M+NH4] <sup>+</sup> | 390 | TG 18:1 18:1 20:3   | [M+NH4] <sup>+</sup> |
| 109 | PC O-36:4    | [M+H] <sup>+</sup> | 250 | PI 38:2 1           | [M+NH4] <sup>+</sup> | 391 | TG 18:1 18:1 21:3   | [M+NH4] <sup>+</sup> |
| 110 | PC O-37:10   | [M+H] <sup>+</sup> | 251 | PI 38:6 1           | [M+NH4] <sup>+</sup> | 392 | TG 18:1 18:1 22:4   | [M+NH4] <sup>+</sup> |
| 111 | PC O-38:1    | [M+H] <sup>+</sup> | 252 | PI 38:6 2           | [M+NH4] <sup>+</sup> | 393 | TG 18:1 18:1 22:5 1 | [M+NH4] <sup>+</sup> |
| 112 | PC O-38:4 1  | [M+H] <sup>+</sup> | 253 | PS 18:0 16:1        | [M+H] <sup>+</sup>   | 394 | TG 18:1 18:1 22:5 2 | [M+NH4] <sup>+</sup> |
| 113 | PC O-38:4 2  | [M+H] <sup>+</sup> | 254 | PS 18:0 18:1        | [M+H] <sup>+</sup>   | 395 | TG 18:1 18:1 22:6   | [M+NH4] <sup>+</sup> |
| 114 | PC O-38:5    | [M+H] <sup>+</sup> | 255 | PS 18:1 18:1        | [M+H] <sup>+</sup>   | 396 | TG 18:1 18:1 24:6   | [M+NH4] <sup>+</sup> |
| 115 | PC O-38:6 1  | [M+H] <sup>+</sup> | 256 | SM 18:0;20/21:0     | [M+H] <sup>+</sup>   | 397 | TG 18:1 18:1 26:1   | [M+NH4] <sup>+</sup> |
| 116 | PC O-38:6 2  | [M+H] <sup>+</sup> | 257 | SM 18:1;20/18:0 1   | [M+H] <sup>+</sup>   | 398 | TG 18:1 18:2 22:6   | [M+NH4] <sup>+</sup> |
| 117 | PC O-39:10 1 | [M+H] <sup>+</sup> | 258 | SM 18:1;20/18:0 2   | [M+H] <sup>+</sup>   | 399 | TG 18:1 19:1 20:1   | [M+NH4] <sup>+</sup> |
| 118 | PC O-39:10 2 | [M+H] <sup>+</sup> | 259 | SM 18:1;20/20:1     | [M+H] <sup>+</sup>   | 400 | TG 18:1 19:1 26:1   | [M+NH4] <sup>+</sup> |
| 119 | PC O-40:1 1  | [M+H] <sup>+</sup> | 260 | SM 18:1;20/26:0     | [M+H] <sup>+</sup>   | 401 | TG 18:1 20:1 20:1   | [M+NH4] <sup>+</sup> |
| 120 | PC O-40:1 2  | [M+H] <sup>+</sup> | 261 | SM 18:2;20/25:0     | [M+H] <sup>+</sup>   | 402 | TG 18:1 20:1 22:4   | [M+NH4] <sup>+</sup> |
| 121 | PC O-40:2    | [M+H] <sup>+</sup> | 262 | TG 12:0 12:0 14:0   | [M+NH4] <sup>+</sup> | 403 | TG 18:1 20:1 22:6   | [M+NH4] <sup>+</sup> |
| 122 | PC O-40:3 1  | [M+H] <sup>+</sup> | 263 | TG 12:0 14:0 14:0 1 | [M+NH4] <sup>+</sup> | 404 | TG 18:1 20:1 26:1   | [M+NH4] <sup>+</sup> |
| 123 | PC O-40:3 2  | [M+H] <sup>+</sup> | 264 | TG 12:0 14:0 14:0 2 | [M+NH4] <sup>+</sup> | 405 | TG 18:1 21:1 26:1   | [M+NH4] <sup>+</sup> |
| 124 | PC O-40:4    | [M+H] <sup>+</sup> | 265 | TG 12:0 14:0 14:1   | [M+NH4] <sup>+</sup> | 406 | TG 18:1 22:1 22:5   | [M+NH4] <sup>+</sup> |
| 125 | PC O-40:5 1  | [M+H] <sup>+</sup> | 266 | TG 12:0 14:0 16:0   | [M+NH4] <sup>+</sup> | 407 | TG 18:1 22:1 26:1   | [M+NH4] <sup>+</sup> |
| 126 | PC O-40:5 2  | [M+H] <sup>+</sup> | 267 | TG 12:0 14:0 16:1   | [M+NH4] <sup>+</sup> | 408 | TG 18:1 24:1 20:4   | [M+NH4] <sup>+</sup> |
| 127 | PC O-40:6_1  | [M+H] <sup>+</sup> | 268 | TG 12:0_14:1_16:1   | [M+NH4] <sup>+</sup> | 409 | TG 18:1_24:1_22:5_2 | [M+NH4] <sup>+</sup> |



|     |              |                    |     |                     |                                   |     |                   |                                   |
|-----|--------------|--------------------|-----|---------------------|-----------------------------------|-----|-------------------|-----------------------------------|
| 128 | PC O-40:6_2  | [M+H] <sup>+</sup> | 269 | TG 12:0_15:0_16:0   | [M+NH <sub>4</sub> ] <sup>+</sup> | 410 | TG 18:1_24:1_24:2 | [M+NH <sub>4</sub> ] <sup>+</sup> |
| 129 | PC O-40:7_1  | [M+H] <sup>+</sup> | 270 | TG 13:0_14:0_16:0   | [M+NH <sub>4</sub> ] <sup>+</sup> | 411 | TG 18:1_26:1_20:4 | [M+NH <sub>4</sub> ] <sup>+</sup> |
| 130 | PC O-40:7_2  | [M+H] <sup>+</sup> | 271 | TG 13:0_16:1_18:1   | [M+NH <sub>4</sub> ] <sup>+</sup> | 412 | TG 18:1_26:1_22:4 | [M+NH <sub>4</sub> ] <sup>+</sup> |
| 131 | PC O-40:7_3  | [M+H] <sup>+</sup> | 272 | TG 14:0_14:0_16:0   | [M+NH <sub>4</sub> ] <sup>+</sup> | 413 | TG 18:1_26:1_22:5 | [M+NH <sub>4</sub> ] <sup>+</sup> |
| 132 | PC O-41:11_2 | [M+H] <sup>+</sup> | 273 | TG 14:0_14:1_16:1   | [M+NH <sub>4</sub> ] <sup>+</sup> | 414 | TG 18:1_26:1_24:2 | [M+NH <sub>4</sub> ] <sup>+</sup> |
| 133 | PC O-42:1_1  | [M+H] <sup>+</sup> | 274 | TG 14:0_15:0_16:0_1 | [M+NH <sub>4</sub> ] <sup>+</sup> | 415 | TG 18:1_26:1_26:1 | [M+NH <sub>4</sub> ] <sup>+</sup> |
| 134 | PC O-42:1_2  | [M+H] <sup>+</sup> | 275 | TG 14:0_15:0_16:0_2 | [M+NH <sub>4</sub> ] <sup>+</sup> | 416 | TG 18:2_18:2_18:3 | [M+NH <sub>4</sub> ] <sup>+</sup> |
| 135 | PC O-42:2    | [M+H] <sup>+</sup> | 276 | TG 14:0_15:0_16:1_1 | [M+NH <sub>4</sub> ] <sup>+</sup> | 417 | TG 23:0_16:1_26:1 | [M+NH <sub>4</sub> ] <sup>+</sup> |
| 136 | PC O-42:3    | [M+H] <sup>+</sup> | 277 | TG 14:0_15:0_16:1_2 | [M+NH <sub>4</sub> ] <sup>+</sup> | 418 | TG 26:0_18:1_18:1 | [M+NH <sub>4</sub> ] <sup>+</sup> |
| 137 | PC O-42:5    | [M+H] <sup>+</sup> | 278 | TG 14:0_16:0_14:1_1 | [M+NH <sub>4</sub> ] <sup>+</sup> | 419 | TG 26:0_18:1_20:1 | [M+NH <sub>4</sub> ] <sup>+</sup> |
| 138 | PC O-42:6_1  | [M+H] <sup>+</sup> | 279 | TG 14:0_16:0_14:1_2 | [M+NH <sub>4</sub> ] <sup>+</sup> | 420 | TG 26:0_18:1_24:1 | [M+NH <sub>4</sub> ] <sup>+</sup> |
| 139 | PC O-42:6_2  | [M+H] <sup>+</sup> | 280 | TG 14:0_16:0_14:1_3 | [M+NH <sub>4</sub> ] <sup>+</sup> | 421 | TG 26:0_18:1_26:1 | [M+NH <sub>4</sub> ] <sup>+</sup> |
| 140 | PC O-43:11   | [M+H] <sup>+</sup> | 281 | TG 14:0_16:0_14:1_4 | [M+NH <sub>4</sub> ] <sup>+</sup> | 422 | TG 27:0_18:1_18:1 | [M+NH <sub>4</sub> ] <sup>+</sup> |
| 141 | PC O-44:2    | [M+H] <sup>+</sup> | 282 | TG 14:0_16:0_16:0   | [M+NH <sub>4</sub> ] <sup>+</sup> |     |                   |                                   |

### Negative ESI

| Number | Metabolite name           | Adduct type | Number | Metabolite name  | Adduct type | Number | Metabolite name  | Adduct type |
|--------|---------------------------|-------------|--------|------------------|-------------|--------|------------------|-------------|
| 1      | Cer 18:0;2O/14:0          | [M-H]-      | 121    | PE O-16:0_18:1   | [M-H]-      | 241    | PE O-18:1_26:1   | [M-H]-      |
| 2      | Cer 18:1;2O/14:0          | [M-H]-      | 122    | PE O-18:1_16:0   | [M-H]-      | 242    | PE O-24:2_20:1   | [M-H]-      |
| 3      | Cer 18:0;2O/16:0          | [M-H]-      | 123    | PE 16:1_18:1     | [M-H]-      | 243    | PE O-24:2_20:2   | [M-H]-      |
| 4      | Cer 18:1;2O/16:0_1        | [M-H]-      | 124    | PE O-16:1_18:1   | [M-H]-      | 244    | PE O-26:3_18:1_1 | [M-H]-      |
| 5      | Cer 18:2;2O/16:0          | [M-H]-      | 125    | PE 16:1_18:2_1   | [M-H]-      | 245    | PE O-26:3_18:1_2 | [M-H]-      |
| 6      | Cer 18:0;2O/18:0          | [M-H]-      | 126    | PE 16:1_18:2_2   | [M-H]-      | 246    | PE O-24:1_20:4_1 | [M-H]-      |
| 7      | Cer 18:1;2O/18:0          | [M-H]-      | 127    | PE O-16:1_18:2_1 | [M-H]-      | 247    | PE O-24:1_20:4_2 | [M-H]-      |
| 8      | Cer 18:1;2O/20:0          | [M-H]-      | 128    | PE O-16:1_18:2_2 | [M-H]-      | 248    | PE O-24:2_20:3_1 | [M-H]-      |
| 9      | Cer 18:0;2O/22:0          | [M-H]-      | 129    | PE O-18:2_16:1   | [M-H]-      | 249    | PE O-24:2_20:3_2 | [M-H]-      |
| 10     | Cer 18:1;2O/22:0          | [M-H]-      | 130    | PE O-14:0_20:4   | [M-H]-      | 250    | PE O-22:2_22:4   | [M-H]-      |
| 11     | Cer 18:1;2O/22:1          | [M-H]-      | 131    | PE O-16:1_18:3   | [M-H]-      | 251    | PE O-24:2_20:4   | [M-H]-      |
| 12     | Cer 18:0;2O/23:0          | [M-H]-      | 132    | PE O-18:3_16:1_1 | [M-H]-      | 252    | PE O-22:1_22:6   | [M-H]-      |
| 13     | Cer 18:1;2O/23:0          | [M-H]-      | 133    | PE O-18:3_16:1_2 | [M-H]-      | 253    | PE O-22:2_22:5   | [M-H]-      |
| 14     | Cer 17:1;2O/24:1          | [M-H]-      | 134    | PE O-14:1_20:4_1 | [M-H]-      | 254    | PE O-24:2_20:5   | [M-H]-      |
| 15     | Cer 18:0;2O/24:0          | [M-H]-      | 135    | PE O-14:1_20:4_2 | [M-H]-      | 255    | PE O-22:2_22:6   | [M-H]-      |
| 16     | Cer 18:0;2O/24:1          | [M-H]-      | 136    | PE O-14:1_20:5   | [M-H]-      | 256    | PE O-26:2_20:1   | [M-H]-      |
| 17     | Cer 18:1;2O/24:0          | [M-H]-      | 137    | PE 17:0_18:1_1   | [M-H]-      | 257    | PE O-24:2_22:4   | [M-H]-      |
| 18     | Cer 18:1;2O/24:1          | [M-H]-      | 138    | PE 17:0_18:1_2   | [M-H]-      | 258    | PE O-26:2_20:4   | [M-H]-      |
| 19     | Cer 18:2;2O/24:1          | [M-H]-      | 139    | PE 17:1_18:1     | [M-H]-      | 259    | PE O-24:2_22:5   | [M-H]-      |
| 20     | Cer 18:1;2O/25:0          | [M-H]-      | 140    | PE O-17:1_18:1   | [M-H]-      | 260    | PE O-24:2_22:6   | [M-H]-      |
| 21     | Cer 18:0;2O/26:1          | [M-H]-      | 141    | PE O-18:2_17:0   | [M-H]-      | 261    | PE O-26:2_22:6   | [M-H]-      |
| 22     | Cer 18:1;2O/26:0          | [M-H]-      | 142    | PE O-16:1_19:2   | [M-H]-      | 262    | PG 16:0_16:0     | [M-H]-      |
| 23     | Cer 18:1;2O/26:1          | [M-H]-      | 143    | PE O-18:2_17:1   | [M-H]-      | 263    | PG 14:0_18:1     | [M-H]-      |
| 24     | CL<br>14:1_16:1_16:1_18:1 | [M-2H]2-    | 144    | PE 15:0_20:4     | [M-H]-      | 264    | PG 16:1_16:1     | [M-H]-      |
| 25     | CL<br>14:0_16:1_18:1_18:1 | [M-2H]2-    | 145    | PE O-16:1_19:3   | [M-H]-      | 265    | PG 16:0_18:1     | [M-H]-      |
| 26     | CL<br>16:1_16:1_16:1_18:1 | [M-2H]2-    | 146    | PE 18:0_18:1     | [M-H]-      | 266    | PG 18:0_18:1     | [M-H]-      |
| 27     | CL<br>16:1_16:1_16:1_18:2 | [M-2H]2-    | 147    | PE O-18:0_18:1_2 | [M-H]-      | 267    | PG 18:1_18:1     | [M-H]-      |
| 28     | CL                        | [M-2H]2-    | 148    | PE O-18:0_18:1_4 | [M-H]-      | 268    | PG 18:1_18:2     | [M-H]-      |

|    |                           |                         |     |                  |                    |     |                |                    |  |
|----|---------------------------|-------------------------|-----|------------------|--------------------|-----|----------------|--------------------|--|
|    | 16:0 16:0 18:1 18:1       |                         |     |                  |                    |     |                |                    |  |
| 29 | CL<br>16:0 16:1 18:1 18:1 | [M-2H] <sup>2-</sup>    | 149 | PE O-20:1_16:0   | [M-H] <sup>-</sup> | 269 | PG 18:1_20:1   | [M-H] <sup>-</sup> |  |
| 30 | CL<br>16:1 16:1 18:1 18:1 | [M-2H] <sup>2-</sup>    | 150 | PE 18:1_18:1     | [M-H] <sup>-</sup> | 270 | PG 18:1_20:2   | [M-H] <sup>-</sup> |  |
| 31 | CL<br>16:1 16:1 18:1 18:2 | [M-2H] <sup>2-</sup>    | 151 | PE O-18:1_18:1   | [M-H] <sup>-</sup> | 271 | PI 14:1_16:1   | [M-H] <sup>-</sup> |  |
| 32 | CL<br>16:1 18:1 18:1 18:1 | [M-2H] <sup>2-</sup>    | 152 | PE 16:0_20:3     | [M-H] <sup>-</sup> | 272 | PI 16:0_16:0   | [M-H] <sup>-</sup> |  |
| 33 | CL<br>16:1 18:1 18:1 18:2 | [M-2H] <sup>2-</sup>    | 153 | PE 18:1_18:2_2   | [M-H] <sup>-</sup> | 273 | PI 16:0_16:1   | [M-H] <sup>-</sup> |  |
| 34 | CL<br>18:1 18:1 18:2 18:2 | [M-2H] <sup>2-</sup>    | 154 | PE O-18:1_18:2   | [M-H] <sup>-</sup> | 274 | PI O-16:0_16:1 | [M-H] <sup>-</sup> |  |
| 35 | DMPE 14:0_14:0            | [M-H] <sup>-</sup>      | 155 | PE O-18:2_18:1   | [M-H] <sup>-</sup> | 275 | PI 16:1_16:1   | [M-H] <sup>-</sup> |  |
| 36 | DMPE 14:0_16:0            | [M-H] <sup>-</sup>      | 156 | PE 16:0_20:4     | [M-H] <sup>-</sup> | 276 | PI 16:0_18:1   | [M-H] <sup>-</sup> |  |
| 37 | DMPE 14:0_16:1            | [M-H] <sup>-</sup>      | 157 | PE 16:1_20:3     | [M-H] <sup>-</sup> | 277 | PI 16:0_18:2   | [M-H] <sup>-</sup> |  |
| 38 | DMPE 16:1_16:1            | [M-H] <sup>-</sup>      | 158 | PE O-16:0_20:4   | [M-H] <sup>-</sup> | 278 | PI 16:1_18:1   | [M-H] <sup>-</sup> |  |
| 39 | Hex2Cer 34:1;2O           | [M+CH3COO] <sup>-</sup> | 159 | PE O-16:1_20:3_1 | [M-H] <sup>-</sup> | 279 | PI 18:0_18:1_1 | [M-H] <sup>-</sup> |  |
| 40 | Hex2Cer 40:1;2O           | [M+CH3COO] <sup>-</sup> | 160 | PE O-16:1_20:3_2 | [M-H] <sup>-</sup> | 280 | PI 18:0_18:1_2 | [M-H] <sup>-</sup> |  |
| 41 | Hex2Cer 42:1;2O           | [M+CH3COO] <sup>-</sup> | 161 | PE 16:0_20:5     | [M-H] <sup>-</sup> | 281 | PI O-16:0_20:1 | [M-H] <sup>-</sup> |  |
| 42 | Hex2Cer 42:2;2O           | [M+CH3COO] <sup>-</sup> | 162 | PE O-16:1_20:4_1 | [M-H] <sup>-</sup> | 282 | PI 18:0_18:2_1 | [M-H] <sup>-</sup> |  |
| 43 | Hex2Cer 44:2;2O           | [M+CH3COO] <sup>-</sup> | 163 | PE O-16:1_20:4_2 | [M-H] <sup>-</sup> | 283 | PI 18:0_18:2_2 | [M-H] <sup>-</sup> |  |
| 44 | Hex3Cer 34:1;2O           | [M+CH3COO] <sup>-</sup> | 164 | PE O-14:1_22:5   | [M-H] <sup>-</sup> | 284 | PI 18:1_18:1   | [M-H] <sup>-</sup> |  |
| 45 | Hex3Cer 42:1;2O           | [M+CH3COO] <sup>-</sup> | 165 | PE O-16:1_20:5   | [M-H] <sup>-</sup> | 285 | PI O-18:1_18:1 | [M-H] <sup>-</sup> |  |
| 46 | Hex3Cer 42:2;2O           | [M+CH3COO] <sup>-</sup> | 166 | PE 18:1_19:1     | [M-H] <sup>-</sup> | 286 | PI 16:0_20:3   | [M-H] <sup>-</sup> |  |
| 47 | LPC 14:0                  | [M+CH3COO] <sup>-</sup> | 167 | PE O-17:1_20:1   | [M-H] <sup>-</sup> | 287 | PI 18:1_18:2   | [M-H] <sup>-</sup> |  |
| 48 | LPC 16:0                  | [M+CH3COO] <sup>-</sup> | 168 | PE O-19:1_18:1   | [M-H] <sup>-</sup> | 288 | PI 16:0_20:4   | [M-H] <sup>-</sup> |  |
| 49 | LPC 16:1                  | [M+CH3COO] <sup>-</sup> | 169 | PE O-16:1_21:2   | [M-H] <sup>-</sup> | 289 | PI O-16:0_20:4 | [M-H] <sup>-</sup> |  |
| 50 | LPC 18:0                  | [M+CH3COO] <sup>-</sup> | 170 | PE O-18:1_19:2   | [M-H] <sup>-</sup> | 290 | PI 16:0_20:5   | [M-H] <sup>-</sup> |  |
| 51 | LPC 18:1                  | [M+CH3COO] <sup>-</sup> | 171 | PE O-17:1_20:3   | [M-H] <sup>-</sup> | 291 | PI 16:1_20:4   | [M-H] <sup>-</sup> |  |
| 52 | LPC 20:0                  | [M+CH3COO] <sup>-</sup> | 172 | PE O-18:1_19:3   | [M-H] <sup>-</sup> | 292 | PI 18:1_19:1   | [M-H] <sup>-</sup> |  |
| 53 | LPC 20:1                  | [M+CH3COO] <sup>-</sup> | 173 | PE O-17:1_20:4_1 | [M-H] <sup>-</sup> | 293 | PI 18:0_20:2_1 | [M-H] <sup>-</sup> |  |
| 54 | LPC 22:1                  | [M+CH3COO] <sup>-</sup> | 174 | PE O-17:1_20:4_2 | [M-H] <sup>-</sup> | 294 | PI 18:0_20:2_2 | [M-H] <sup>-</sup> |  |
| 55 | LPC 24:1                  | [M+CH3COO] <sup>-</sup> | 175 | PE O-17:1_20:5   | [M-H] <sup>-</sup> | 295 | PI 18:1_20:1   | [M-H] <sup>-</sup> |  |

|    |                |             |     |                  |        |     |                 |        |
|----|----------------|-------------|-----|------------------|--------|-----|-----------------|--------|
| 56 | LPE 16:0       | [M-H]-      | 176 | PE 18:0 20:1     | [M-H]- | 296 | PI 18:0 20:3 1  | [M-H]- |
| 57 | LPE 16:1       | [M-H]-      | 177 | PE O-22:1 16:0   | [M-H]- | 297 | PI 18:0 20:3 2  | [M-H]- |
| 58 | LPE 17:1       | [M-H]-      | 178 | PE 18:0 20:2     | [M-H]- | 298 | PI 18:1 20:2    | [M-H]- |
| 59 | LPE 18:0       | [M-H]-      | 179 | PE 18:1 20:1     | [M-H]- | 299 | PI 16:0 22:4    | [M-H]- |
| 60 | LPE 18:1       | [M-H]-      | 180 | PE 18:0 20:3 1   | [M-H]- | 300 | PI 18:0 20:4    | [M-H]- |
| 61 | LPE 18:2       | [M-H]-      | 181 | PE 18:0 20:3 2   | [M-H]- | 301 | PI 18:1 20:3    | [M-H]- |
| 62 | LPE 20:1       | [M-H]-      | 182 | PE O-18:1 20:2   | [M-H]- | 302 | PI O-18:0 20:4  | [M-H]- |
| 63 | LPE 20:3       | [M-H]-      | 183 | PE 16:0 22:4     | [M-H]- | 303 | PI 16:0 22:5    | [M-H]- |
| 64 | LPE 20:4       | [M-H]-      | 184 | PE 18:0 20:4     | [M-H]- | 304 | PI 18:1 20:4    | [M-H]- |
| 65 | LPE 22:0       | [M-H]-      | 185 | PE 18:1 20:3     | [M-H]- | 305 | PI O-16:0 22:5  | [M-H]- |
| 66 | LPE 22:5       | [M-H]-      | 186 | PE O-18:0 20:4 1 | [M-H]- | 306 | PI 16:0 22:6    | [M-H]- |
| 67 | LPE 22:6       | [M-H]-      | 187 | PE O-18:0 20:4 2 | [M-H]- | 307 | PI 18:2 20:4    | [M-H]- |
| 68 | LPE 24:0       | [M-H]-      | 188 | PE O-18:1 20:3 1 | [M-H]- | 308 | PI O-16:0 22:6  | [M-H]- |
| 69 | LPE 24:1       | [M-H]-      | 189 | PE O-18:1 20:3 2 | [M-H]- | 309 | PI 19:0 20:4    | [M-H]- |
| 70 | LPE 26:0       | [M-H]-      | 190 | PE 18:0 20:5     | [M-H]- | 310 | PI 18:0 22:2    | [M-H]- |
| 71 | LPE 26:1       | [M-H]-      | 191 | PE 18:1 20:4     | [M-H]- | 311 | PI 18:1 22:2    | [M-H]- |
| 72 | LPG 18:1       | [M-H]-      | 192 | PE O-16:1 22:4   | [M-H]- | 312 | PI 18:0 22:5 1  | [M-H]- |
| 73 | LPG 22:6       | [M-H]-      | 193 | PE O-18:1 20:4   | [M-H]- | 313 | PI 18:0 22:5 2  | [M-H]- |
| 74 | LPG O-17:1     | [M-H]-      | 194 | PE 16:0 22:6     | [M-H]- | 314 | PI O-18:0 22:5  | [M-H]- |
| 75 | LPI 18:0       | [M-H]-      | 195 | PE O-18:1 20:5   | [M-H]- | 315 | PI 18:0 22:6    | [M-H]- |
| 76 | LPI 18:1       | [M-H]-      | 196 | PE O-18:2 20:4   | [M-H]- | 316 | PI 18:1 22:5 1  | [M-H]- |
| 77 | LPI 20:4       | [M-H]-      | 197 | PE O-16:1 22:6   | [M-H]- | 317 | PI 18:1 22:5 2  | [M-H]- |
| 78 | LPS 16:1       | [M-H]-      | 198 | PE O-18:2 20:5   | [M-H]- | 318 | PI O-18:0 22:6  | [M-H]- |
| 79 | LPS 18:1       | [M-H]-      | 199 | PE O-17:1 22:4   | [M-H]- | 319 | PI O-18:1 22:5  | [M-H]- |
| 80 | MMPE 16:0 16:1 | [M-H]-      | 200 | PE O-19:1 20:4   | [M-H]- | 320 | PI 18:1 22:6    | [M-H]- |
| 81 | PA 18:0 16:1   | [M-H]-      | 201 | PE O-17:1 22:5   | [M-H]- | 321 | PI O-18:1 22:6  | [M-H]- |
| 82 | PC O-16:0 14:0 | [M+CH3COO]- | 202 | PE O-24:1 16:0   | [M-H]- | 322 | PMeOH 14:0 16:1 | [M-H]- |
| 83 | PC O-16:0 16:0 | [M+CH3COO]- | 203 | PE O-24:2 16:0   | [M-H]- | 323 | PMeOH 16:0 16:1 | [M-H]- |
| 84 | PC O-18:1 16:0 | [M+CH3COO]- | 204 | PE O-22:2 18:1   | [M-H]- | 324 | PMeOH 16:1 16:1 | [M-H]- |
| 85 | PC O-18:1 16:1 | [M+CH3COO]- | 205 | PE 18:0 22:4     | [M-H]- | 325 | PMeOH 16:1 18:1 | [M-H]- |
| 86 | PC O-18:1 18:1 | [M+CH3COO]- | 206 | PE 20:0 20:4     | [M-H]- | 326 | PS 16:0 16:1 2  | [M-H]- |
| 87 | PC O-18:2 18:1 | [M+CH3COO]- | 207 | PE O-20:1 20:3 1 | [M-H]- | 327 | PS 17:0 16:1    | [M-H]- |
| 88 | PC O-16:0 20:4 | [M+CH3COO]- | 208 | PE O-20:1 20:3 2 | [M-H]- | 328 | PS 16:0 18:1    | [M-H]- |
| 89 | PC O-16:1 20:4 | [M+CH3COO]- | 209 | PE 18:0 22:5     | [M-H]- | 329 | PS 18:0 16:1 1  | [M-H]- |

|     |                |             |     |                  |        |     |                |        |
|-----|----------------|-------------|-----|------------------|--------|-----|----------------|--------|
| 90  | PC O-16:0 22:6 | [M+CH3COO]- | 210 | PE O-18:0 22:5   | [M-H]- | 330 | PS 18:0 16:1 2 | [M-H]- |
| 91  | PC O-18:2 20:4 | [M+CH3COO]- | 211 | PE O-18:1 22:4 1 | [M-H]- | 331 | PS 16:1 18:1 1 | [M-H]- |
| 92  | PC O-24:0 16:0 | [M+CH3COO]- | 212 | PE O-18:1 22:4 2 | [M-H]- | 332 | PS 16:1 18:1 3 | [M-H]- |
| 93  | PC O-24:1 16:0 | [M+CH3COO]- | 213 | PE O-20:1 20:4   | [M-H]- | 333 | PS 17:0 18:1 1 | [M-H]- |
| 94  | PC O-24:1 16:1 | [M+CH3COO]- | 214 | PE 18:0 22:6     | [M-H]- | 334 | PS 18:0 18:1 1 | [M-H]- |
| 95  | PC O-24:0 18:1 | [M+CH3COO]- | 215 | PE O-20:1 20:5   | [M-H]- | 335 | PS 18:0 18:1 3 | [M-H]- |
| 96  | PC O-24:1 18:1 | [M+CH3COO]- | 216 | PE 18:1 22:6     | [M-H]- | 336 | PS 18:1 18:1 1 | [M-H]- |
| 97  | PC O-24:1 18:2 | [M+CH3COO]- | 217 | PE O-18:1 22:6   | [M-H]- | 337 | PS 18:1 18:1 2 | [M-H]- |
| 98  | PC O-26:1 18:1 | [M+CH3COO]- | 218 | PE O-18:2 22:5 1 | [M-H]- | 338 | PS 18:1 18:1 3 | [M-H]- |
| 99  | PE 14:0 14:0   | [M-H]-      | 219 | PE O-18:2 22:5 2 | [M-H]- | 339 | PS 18:1 18:2 1 | [M-H]- |
| 100 | PE 14:0 16:0   | [M-H]-      | 220 | PE O-18:3 22:6   | [M-H]- | 340 | PS 18:1 18:2 2 | [M-H]- |
| 101 | PE 14:0 16:1   | [M-H]-      | 221 | PE O-21:1 20:1   | [M-H]- | 341 | PS 18:0 20:3 1 | [M-H]- |
| 102 | PE O-16:0 14:1 | [M-H]-      | 222 | PE O-24:0 18:1   | [M-H]- | 342 | PS 18:0 20:3 2 | [M-H]- |
| 103 | PE O-16:1 14:0 | [M-H]-      | 223 | PE 18:1 24:1     | [M-H]- | 343 | PS 18:0 20:4 1 | [M-H]- |
| 104 | PE O-16:1 14:1 | [M-H]-      | 224 | PE O-24:1 18:1 1 | [M-H]- | 344 | PS 18:0 20:4 2 | [M-H]- |
| 105 | PE O-16:0 16:0 | [M-H]-      | 225 | PE O-24:1 18:1 2 | [M-H]- | 345 | PS 18:1 20:4   | [M-H]- |
| 106 | PE 16:0 16:1   | [M-H]-      | 226 | PE O-26:2 16:0   | [M-H]- | 346 | PS 22:0 18:1 1 | [M-H]- |
| 107 | PE O-16:0 16:1 | [M-H]-      | 227 | PE O-24:2 18:1   | [M-H]- | 347 | PS 22:0 18:1 2 | [M-H]- |
| 108 | PE O-16:1 16:0 | [M-H]-      | 228 | PE 22:0 20:4     | [M-H]- | 348 | PS 22:0 18:1 3 | [M-H]- |
| 109 | PE 16:1 16:1   | [M-H]-      | 229 | PE O-24:2 18:2   | [M-H]- | 349 | PS 18:1 22:1 1 | [M-H]- |
| 110 | PE O-16:1 16:1 | [M-H]-      | 230 | PE O-22:1 20:4   | [M-H]- | 350 | PS 18:1 22:1 2 | [M-H]- |
| 111 | PE O-14:1 18:2 | [M-H]-      | 231 | PE O-22:2 20:3 1 | [M-H]- | 351 | PS 18:0 22:4   | [M-H]- |
| 112 | PE O-18:2 14:1 | [M-H]-      | 232 | PE O-22:2 20:3 2 | [M-H]- | 352 | PS 18:0 22:5 1 | [M-H]- |
| 113 | PE 16:0 17:1   | [M-H]-      | 233 | PE O-18:2 24:4   | [M-H]- | 353 | PS 18:0 22:5 2 | [M-H]- |
| 114 | PE O-16:1 17:0 | [M-H]-      | 234 | PE O-22:2 20:4   | [M-H]- | 354 | PS 18:0 22:5 3 | [M-H]- |
| 115 | PE 16:1 17:1   | [M-H]-      | 235 | PE 20:1 22:6     | [M-H]- | 355 | PS 18:0 22:6 1 | [M-H]- |
| 116 | PE O-16:1 17:1 | [M-H]-      | 236 | PE O-20:1 22:6   | [M-H]- | 356 | PS 18:0 22:6 2 | [M-H]- |
| 117 | PE O-18:2 15:0 | [M-H]-      | 237 | PE O-20:2 22:5   | [M-H]- | 357 | PS 18:1 22:6   | [M-H]- |
| 118 | PE O-13:1 20:4 | [M-H]-      | 238 | PE O-22:2 20:5   | [M-H]- | 358 | PS 18:1 24:1 1 | [M-H]- |
| 119 | PE 16:0 18:0   | [M-H]-      | 239 | PE O-20:2 22:6   | [M-H]- | 359 | PS 18:1 24:1 2 | [M-H]- |
| 120 | PE 16:0 18:1   | [M-H]-      | 240 | PE 18:1 26:1     | [M-H]- |     |                |        |

**Table S5.** Mass peaks to pathways analysis of positive untargeted metabolomics data in acute model (0 versus 80  $\mu\text{g}/\text{mL}$ ): top 16 pathways.

| <b>Name of pathway</b>                                     | <b>Total features</b> | <b>Hits</b> | <b>Significant hits</b> | <b>P-value (combined)</b> |
|------------------------------------------------------------|-----------------------|-------------|-------------------------|---------------------------|
| Porphyrin and chlorophyll metabolism                       | 27                    | 18          | 7                       | 0.012                     |
| Biosynthesis of unsaturated fatty acids                    | 34                    | 6           | 3                       | 0.029                     |
| Mannose type O-glycan biosynthesis                         | 16                    | 6           | 2                       | 0.070                     |
| Terpenoid backbone biosynthesis                            | 15                    | 7           | 3                       | 0.076                     |
| Arachidonic acid metabolism                                | 35                    | 26          | 6                       | 0.090                     |
| Glycosylphosphatidylinositol (GPI)-anchor biosynthesis     | 11                    | 5           | 1                       | 0.097                     |
| Sphingolipid metabolism                                    | 9                     | 8           | 3                       | 0.100                     |
| Amino sugar and nucleotide sugar metabolism                | 35                    | 29          | 7                       | 0.114                     |
| Steroid hormone biosynthesis                               | 85                    | 64          | 14                      | 0.149                     |
| Primary bile acid biosynthesis                             | 46                    | 37          | 9                       | 0.176                     |
| Propanoate metabolism                                      | 19                    | 7           | 3                       | 0.182                     |
| Thiamine metabolism                                        | 5                     | 2           | 1                       | 0.219                     |
| N-Glycan biosynthesis                                      | 38                    | 8           | 2                       | 0.225                     |
| Glycosphingolipid biosynthesis - globo and isoglobo series | 15                    | 9           | 4                       | 0.247                     |
| Folate biosynthesis                                        | 24                    | 17          | 5                       | 0.248                     |
| Fatty acid biosynthesis                                    | 10                    | 6           | 1                       | 0.260                     |

**Table S6.** Mass peaks to pathways analysis of positive untargeted metabolomics data in acute model (0 versus 80  $\mu\text{g}/\text{mL}$ ) with selected  $m/z$  features through the Jonckheere-Terpstra test: top 16 pathways and excluded pathways from Table S1.

| <b>Name of pathway</b>                                     | <b>Total features</b> | <b>Hits</b> | <b>Significant hits</b> | <b>P-value (combined)</b> |
|------------------------------------------------------------|-----------------------|-------------|-------------------------|---------------------------|
| Porphyrin and chlorophyll metabolism                       | 27                    | 6           | 6                       | 0.052                     |
| Arachidonic acid metabolism                                | 35                    | 12          | 5                       | 0.152                     |
| Steroid hormone biosynthesis                               | 85                    | 15          | 9                       | 0.162                     |
| Riboflavin metabolism                                      | 4                     | 2           | 2                       | 0.209                     |
| Sphingolipid metabolism                                    | 9                     | 4           | 3                       | 0.276                     |
| Terpenoid backbone biosynthesis                            | 15                    | 3           | 3                       | 0.295                     |
| Biosynthesis of unsaturated fatty acids                    | 34                    | 2           | 2                       | 0.303                     |
| Galactose metabolism                                       | 27                    | 3           | 1                       | 0.327                     |
| Pyruvate metabolism                                        | 19                    | 1           | 1                       | 0.368                     |
| Thiamine metabolism                                        | 5                     | 1           | 1                       | 0.368                     |
| Fatty acid biosynthesis                                    | 10                    | 1           | 1                       | 0.398                     |
| Starch and sucrose metabolism                              | 13                    | 1           | 1                       | 0.398                     |
| Glycosylphosphatidylinositol (GPI)-anchor biosynthesis     | 11                    | 1           | 1                       | 0.398                     |
| Tryptophan metabolism                                      | 41                    | 3           | 3                       | 0.436                     |
| Purine metabolism                                          | 65                    | 7           | 4                       | 0.438                     |
| Valine, leucine and isoleucine degradation                 | 35                    | 6           | 3                       | 0.448                     |
| Amino sugar and nucleotide sugar metabolism                | 35                    | 3           | 1                       | 0.490                     |
| Folate biosynthesis                                        | 24                    | 4           | 3                       | 0.499                     |
| Mannose type O-glycan biosynthesis                         | 16                    | 4           | 2                       | 0.572                     |
| Propanoate metabolism                                      | 19                    | 3           | 3                       | 0.761                     |
| Primary bile acid biosynthesis                             | 46                    | 12          | 7                       | 0.803                     |
| N-Glycan biosynthesis                                      | 38                    | 1           | 1                       | 0.864                     |
| Glycosphingolipid biosynthesis - globo and isoglobo series | 15                    | 3           | 2                       | 0.928                     |

**Table S7.** Matched metabolite list from two major pathways: 'steroid hormone biosynthesis' and 'arachidonic acid metabolism'.

| Detected MS                         | Detected RT | Adduct     | MS difference | Name                                                                                                                                                          |
|-------------------------------------|-------------|------------|---------------|---------------------------------------------------------------------------------------------------------------------------------------------------------------|
| <b>Steroid hormone biosynthesis</b> |             |            |               |                                                                                                                                                               |
| 309.1528244                         | 1.66        | M+Na-2H[-] | 0.0055327     | Estriol; 2-Hydroxyestradiol                                                                                                                                   |
| 323.1682221                         | 1.65        | M+Na-2H[-] | 0.005280336   | 11beta-Hydroxyandrost-4-ene-3,17-dione; 2-Methoxy-17beta-estradiol; 19-Hydroxyandrostenedione; 19-Oxotestosterone; 16alpha-Hydroxyandrost-4-ene-3,17-dione    |
| 325.1837363                         | 1.61        | M+Na-2H[-] | 0.005144472   | 16alpha-Hydroxydehydroepiandrosterone; 19-Hydroxytestosterone; 11-Dehydrocorticosterone; 11beta-Hydroxytestosterone; 7alpha-Hydroxydehydroepiandrosterone     |
| 327.184569                          | 1.61        | M+Cl37[-]  | 0.005911204   | Androstenediol; Etiocholanolone; Androsterone; Dihydrotestosterone; 5beta-Dihydrotestosterone                                                                 |
| 341.1793854                         | 1.12        | M-H2O-H[-] | 0.003587861   | Aldosterone; Cortisone                                                                                                                                        |
| 342.2007354                         | 1.60        | M+ACN-H[-] | 0.006727831   | 11beta-Hydroxyandrost-4-ene-3,17-dione; 2-Methoxy-17beta-estradiol; 19-Hydroxyandrostenedione; 19-Oxotestosterone; 16alpha-Hydroxyandrost-4-ene-3,17-dione    |
| 351.1987698                         | 1.62        | M+Na-2H[-] | 0.004527908   | 11-Deoxycorticosterone; 17alpha-Hydroxyprogesterone                                                                                                           |
| 353.2157519                         | 1.58        | M+Na-2H[-] | 0.005859944   | 21-Hydroxypregnenolone; 17alpha-Hydroxypregnenolone; 5alpha-Dihydrodeoxycorticosterone; 7alpha-Hydroxypregnenolone; 17alpha,20alpha-Dihydroxypregn-4-en-3-one |
| 369.209161                          | 1.10        | M+Na-2H[-] | 0.004354422   | 17alpha,21-Dihydroxypregnenolone; 11beta,21-Dihydroxy-5beta-pregnane-3,20-dione; 3alpha,21-Dihydroxy-5beta-pregnane-11,20-dione                               |
| 370.2316755                         | 1.55        | M+ACN-H[-] | 0.007087859   | 11-Deoxycorticosterone; 17alpha-Hydroxyprogesterone                                                                                                           |
| 371.0915447                         | 5.47        | M+Na-2H[-] | 0.00199687    | Estrone 3-sulfate;                                                                                                                                            |
| 381.1751086                         | 1.09        | M+Na-2H[-] | 0.006687528   | Aldosterone; Cortisone                                                                                                                                        |
| 381.1898467                         | 5.31        | M+Cl[-]    | 0.006537252   | Corticosterone; 21-Hydroxy-5beta-pregnane-3,11,20-trione; 11-Deoxycortisol; 21-Deoxycortisol                                                                  |
| 381.2323024                         | 1.39        | M-H+O[-]   | 0.004044669   | Tetrahydrocortisol;                                                                                                                                           |
| 390.2678775                         | 2.88        | M+ACN-H[-] | 0.002899391   | Tetrahydrocorticosterone;                                                                                                                                     |
| 459.2051908                         | 1.59        | M-H2O-H[-] | 0.002784581   | 2-Methoxy-estradiol-17beta 3-glucuronide;                                                                                                                     |
| 465.3032775                         | 1.39        | M-H[-]     | 0.001126683   | Cholesterol sulfate;                                                                                                                                          |
| 481.2993456                         | 1.57        | M-H+O[-]   | 3.14E-05      | Cholesterol sulfate;                                                                                                                                          |



---

**Arachidonic acid metabolism**

---

|             |      |            |             |                                                                                                                                                                                                                                                                                                                                                                                                                       |
|-------------|------|------------|-------------|-----------------------------------------------------------------------------------------------------------------------------------------------------------------------------------------------------------------------------------------------------------------------------------------------------------------------------------------------------------------------------------------------------------------------|
| 303.2321205 | 1.09 | M-H[-]     | 0.000833301 | Arachidonic acid                                                                                                                                                                                                                                                                                                                                                                                                      |
| 381.2323024 | 1.39 | M+HCOO[-]  | 0.004597888 | 15-Hydroxy-11,12-epoxyeicosatrienoic acid; 11-Hydroxy-14,15-epoxyeicosatrienoic acid; 15-Hydroperoxyeicosatetraenoic acid; 5(S)-Hydroperoxy-6-trans-8,11,14-cis-eicosatetraenoic acid; Leukotriene B4; (5Z,9E,11Z,14Z)-(8S)-8-Hydroperoxyeicosa-5,9,11,14-tetraenoic acid; (5Z,8Z,10E,14Z)-(12R)-12-Hydroperoxyeicosa-5,8,10,14-tetraenoic acid; (5Z,8Z,10E,14Z)-(12S)-12-Hydroperoxyeicosa-5,8,10,14-tetraenoic acid |
| 339.1999486 | 1.59 | M+Na-2H[-] | 0.005706708 | Leukotriene A4                                                                                                                                                                                                                                                                                                                                                                                                        |
| 369.2314619 | 1.56 | M-H+O[-]   | 0.003204169 | 11,12,15-Trihydroxyicosatrienoic acid; 11,14,15-Trihydroxyicosatrienoic acid; 11-epi-Prostaglandin F2alpha; Prostaglandin F2alpha                                                                                                                                                                                                                                                                                     |

---
