# Supplementary figures and images for: Exposure to nano-polystyrene induces metabolic alteration in lipid homeostasis in Caco-2
Source: Royal Society of Chemistry journal article supplement (doi:10.1039/d1en00145k), 2021-01-01

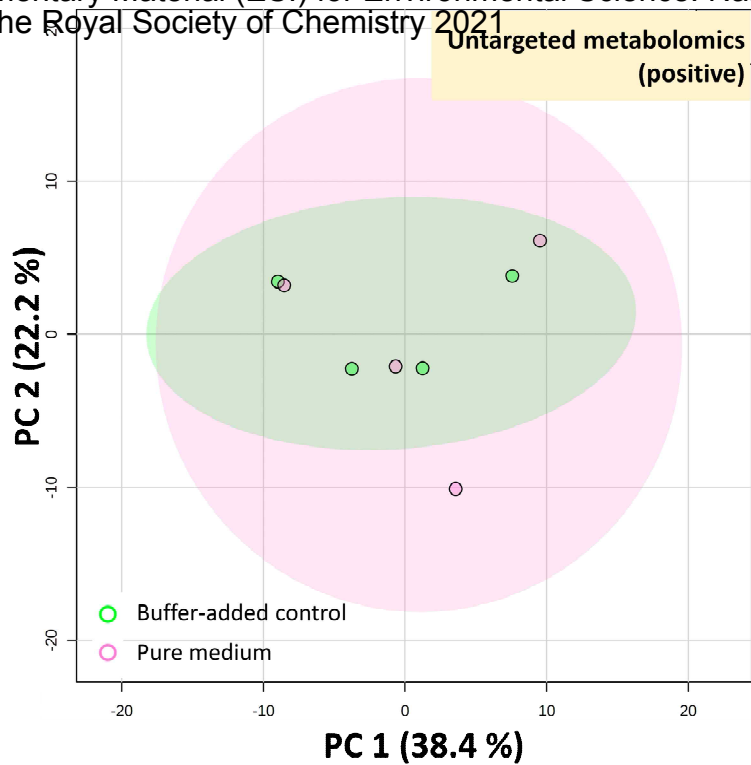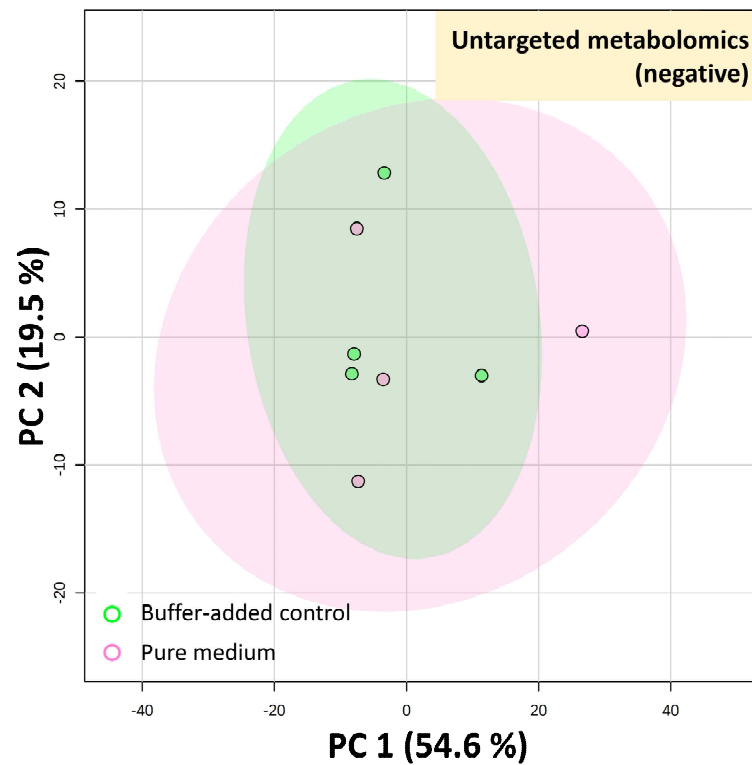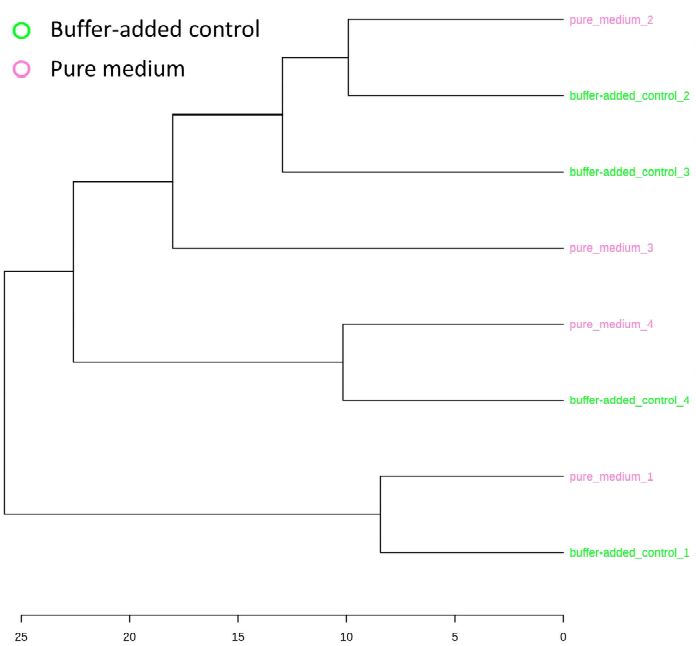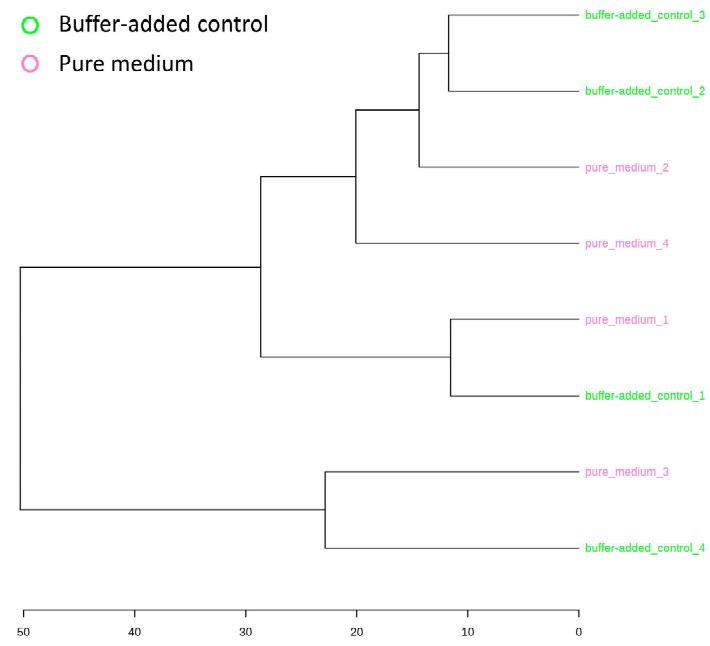

Supplement: d1en00145k2.pdf [file d1en00145k2.pdf]

**(A)**

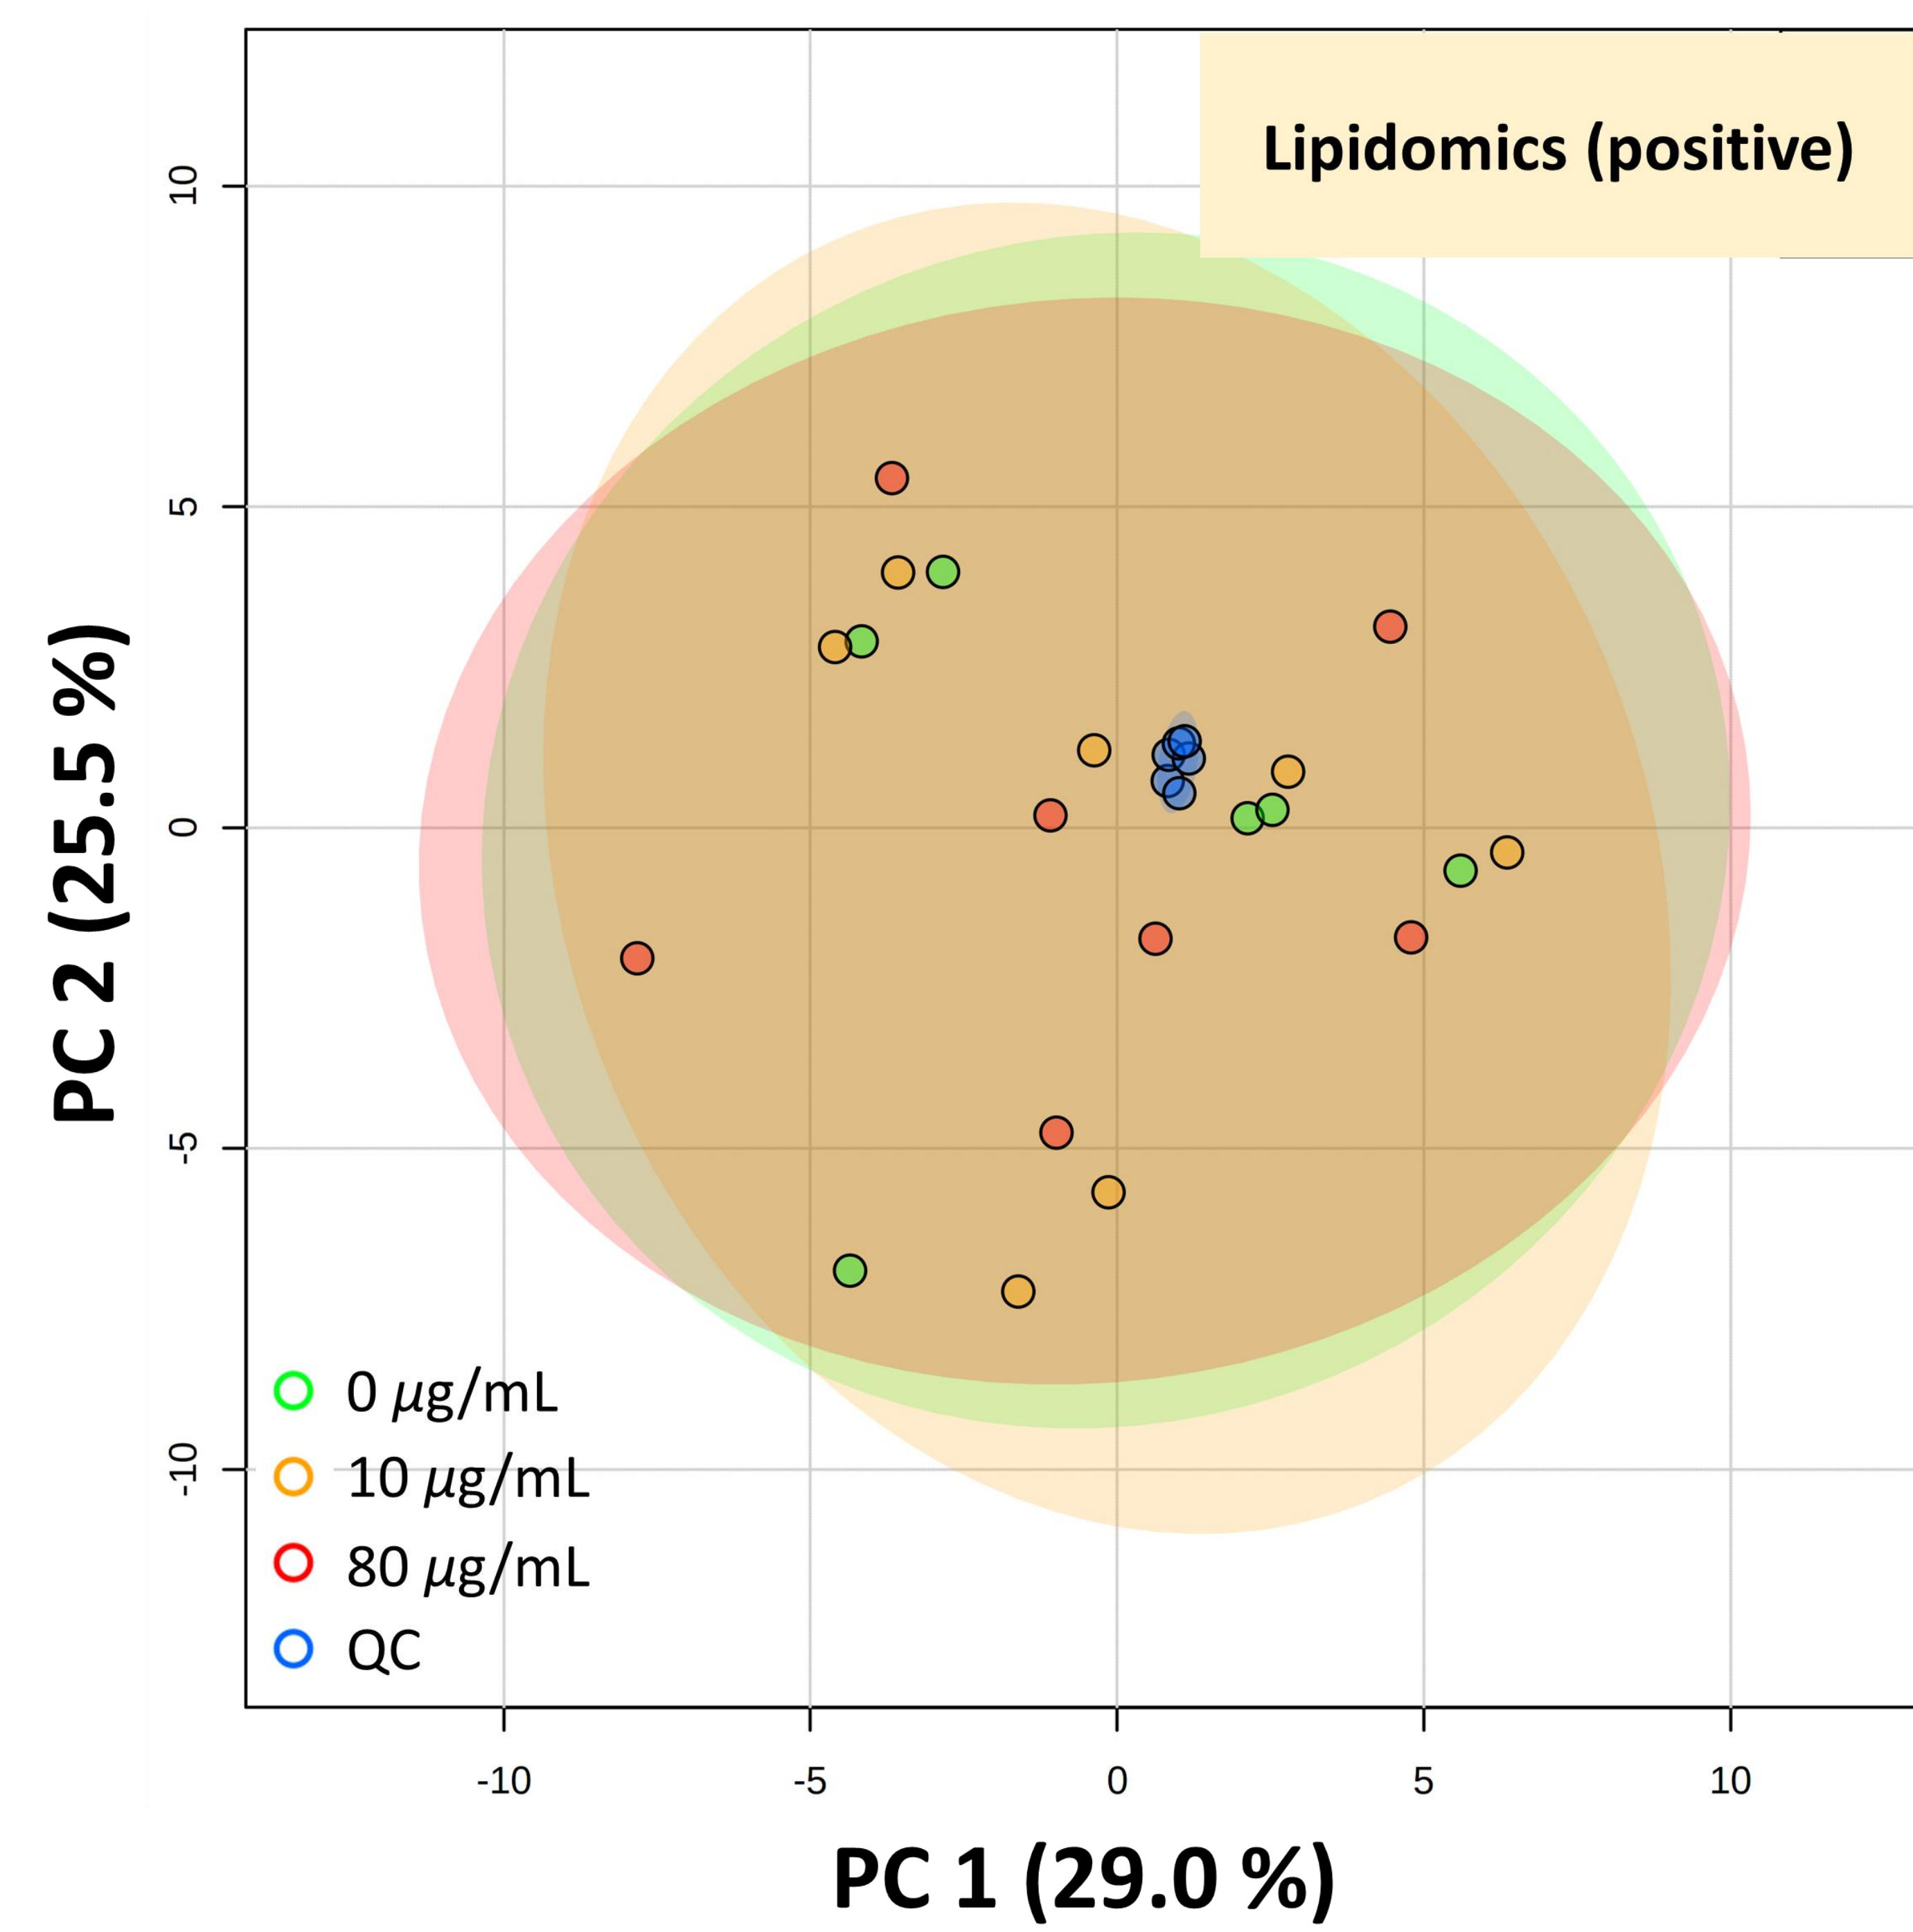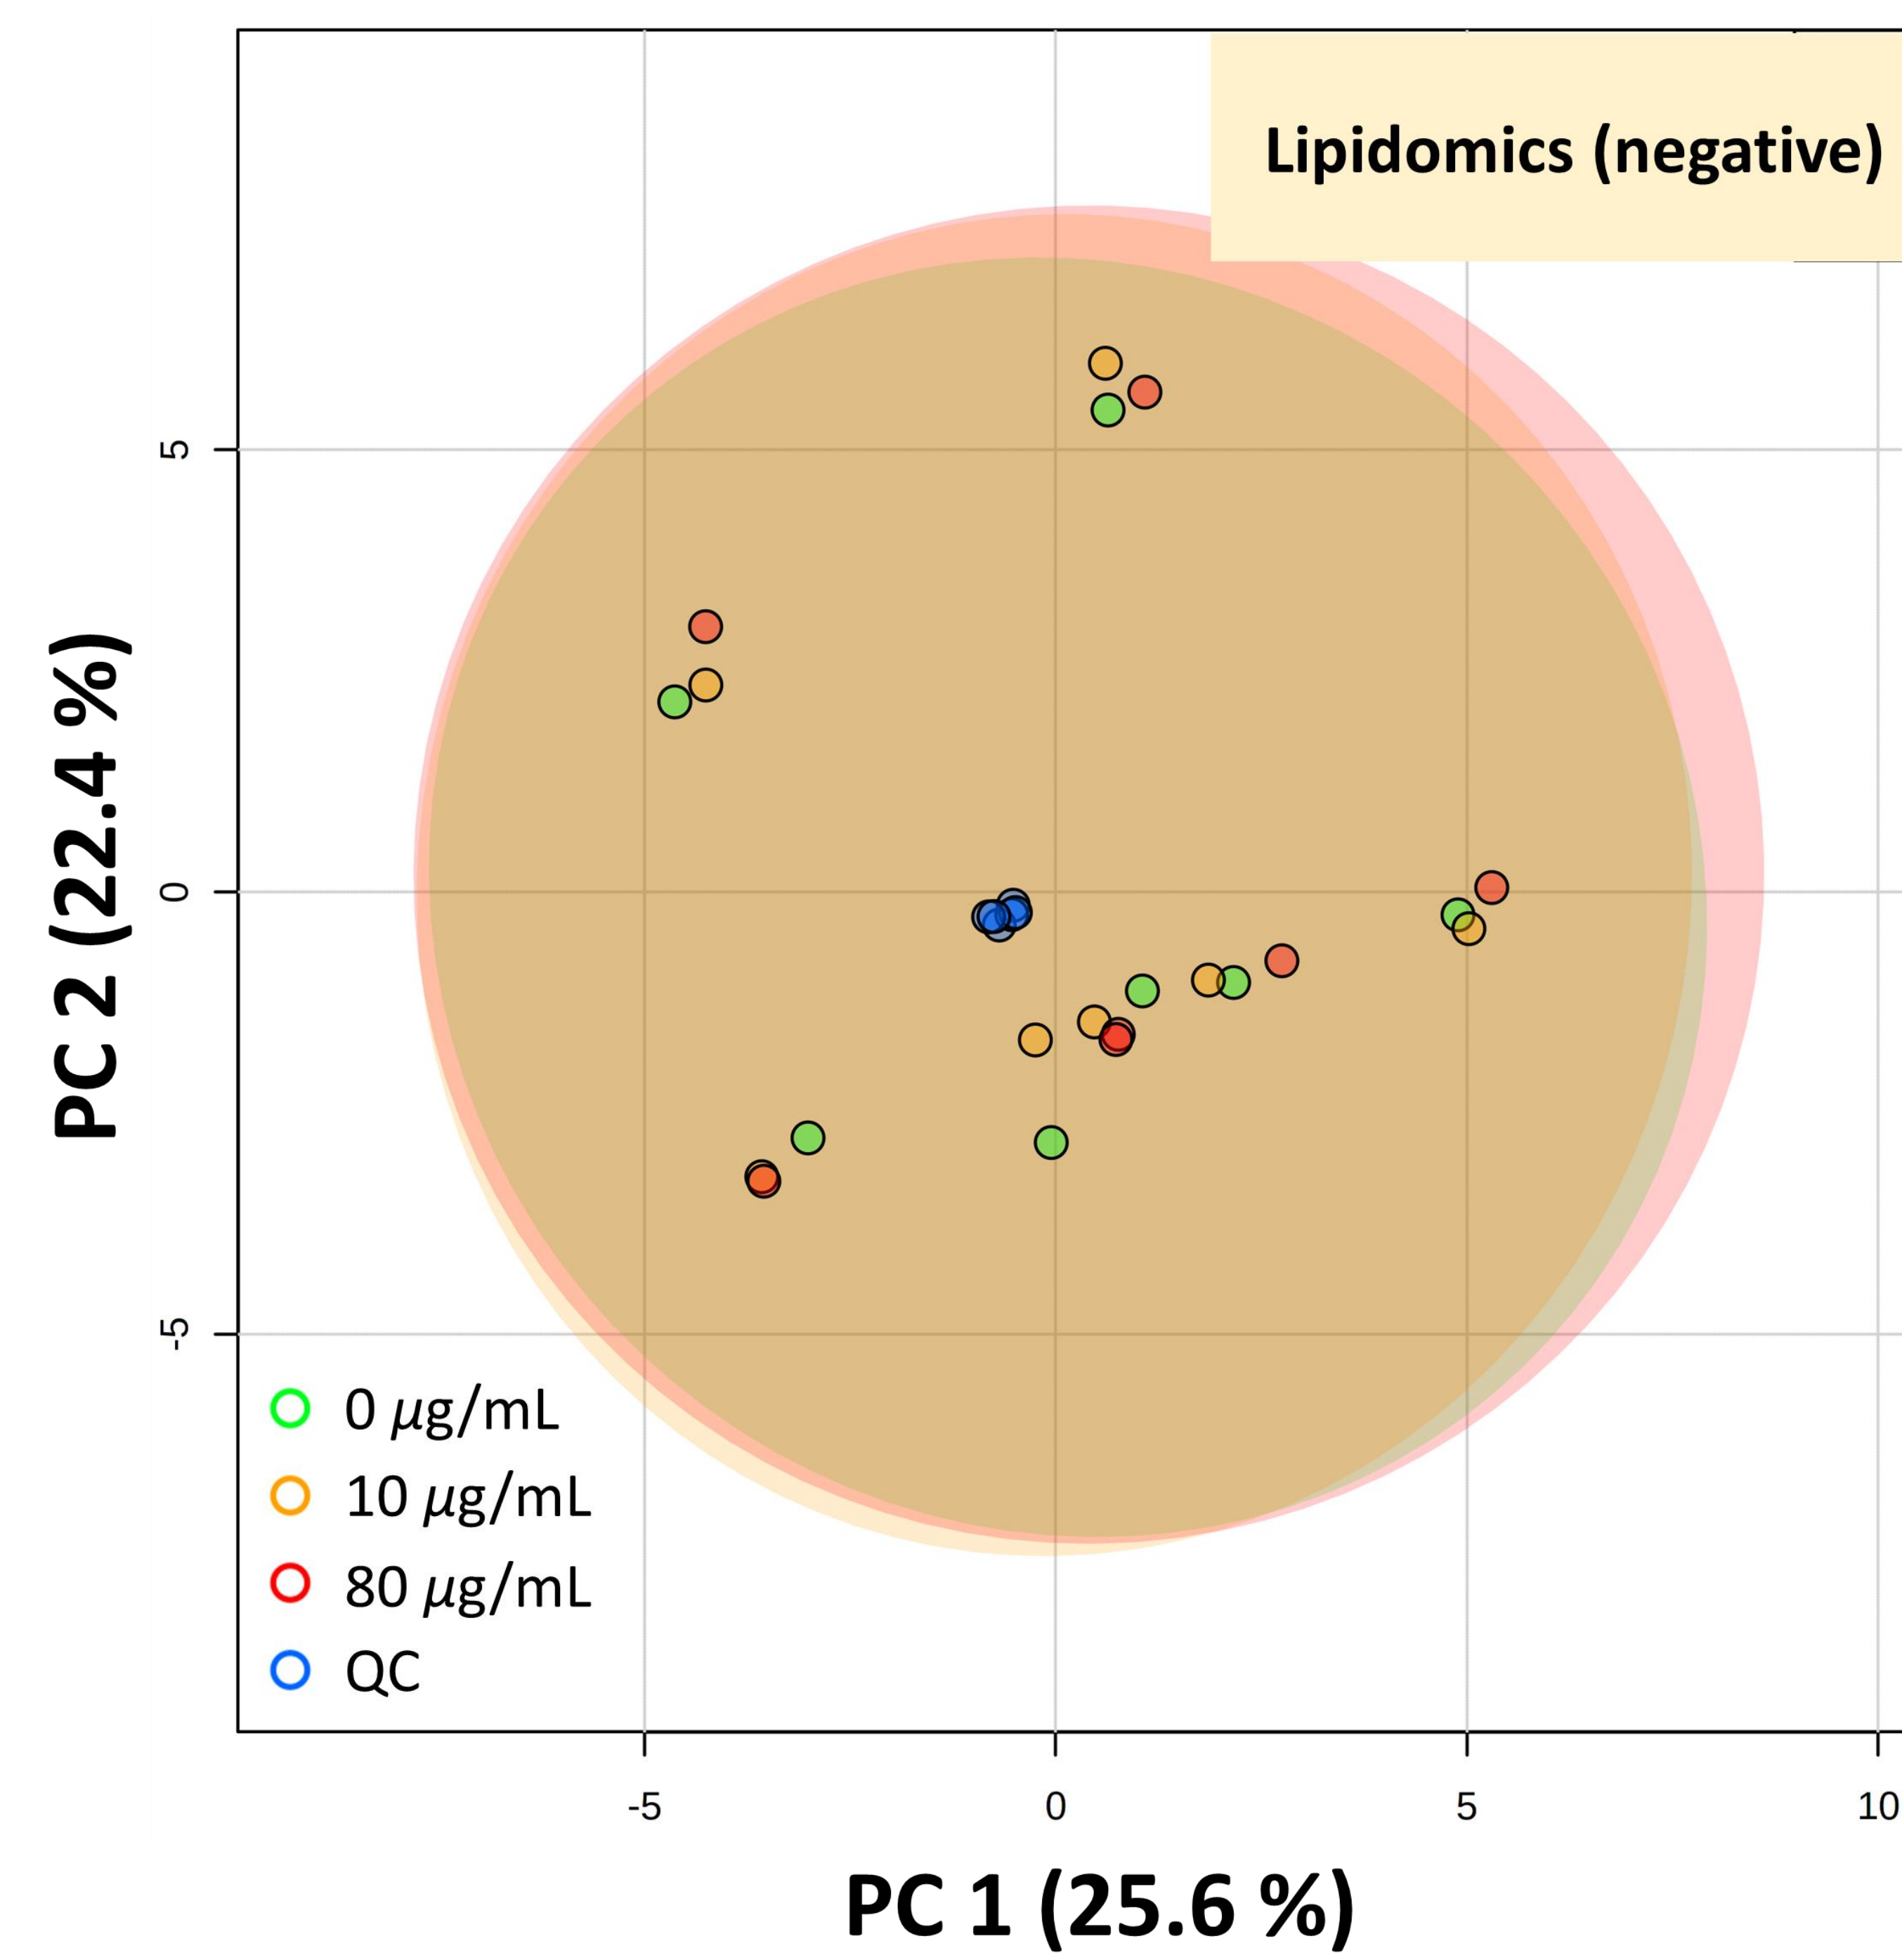

**(B)**

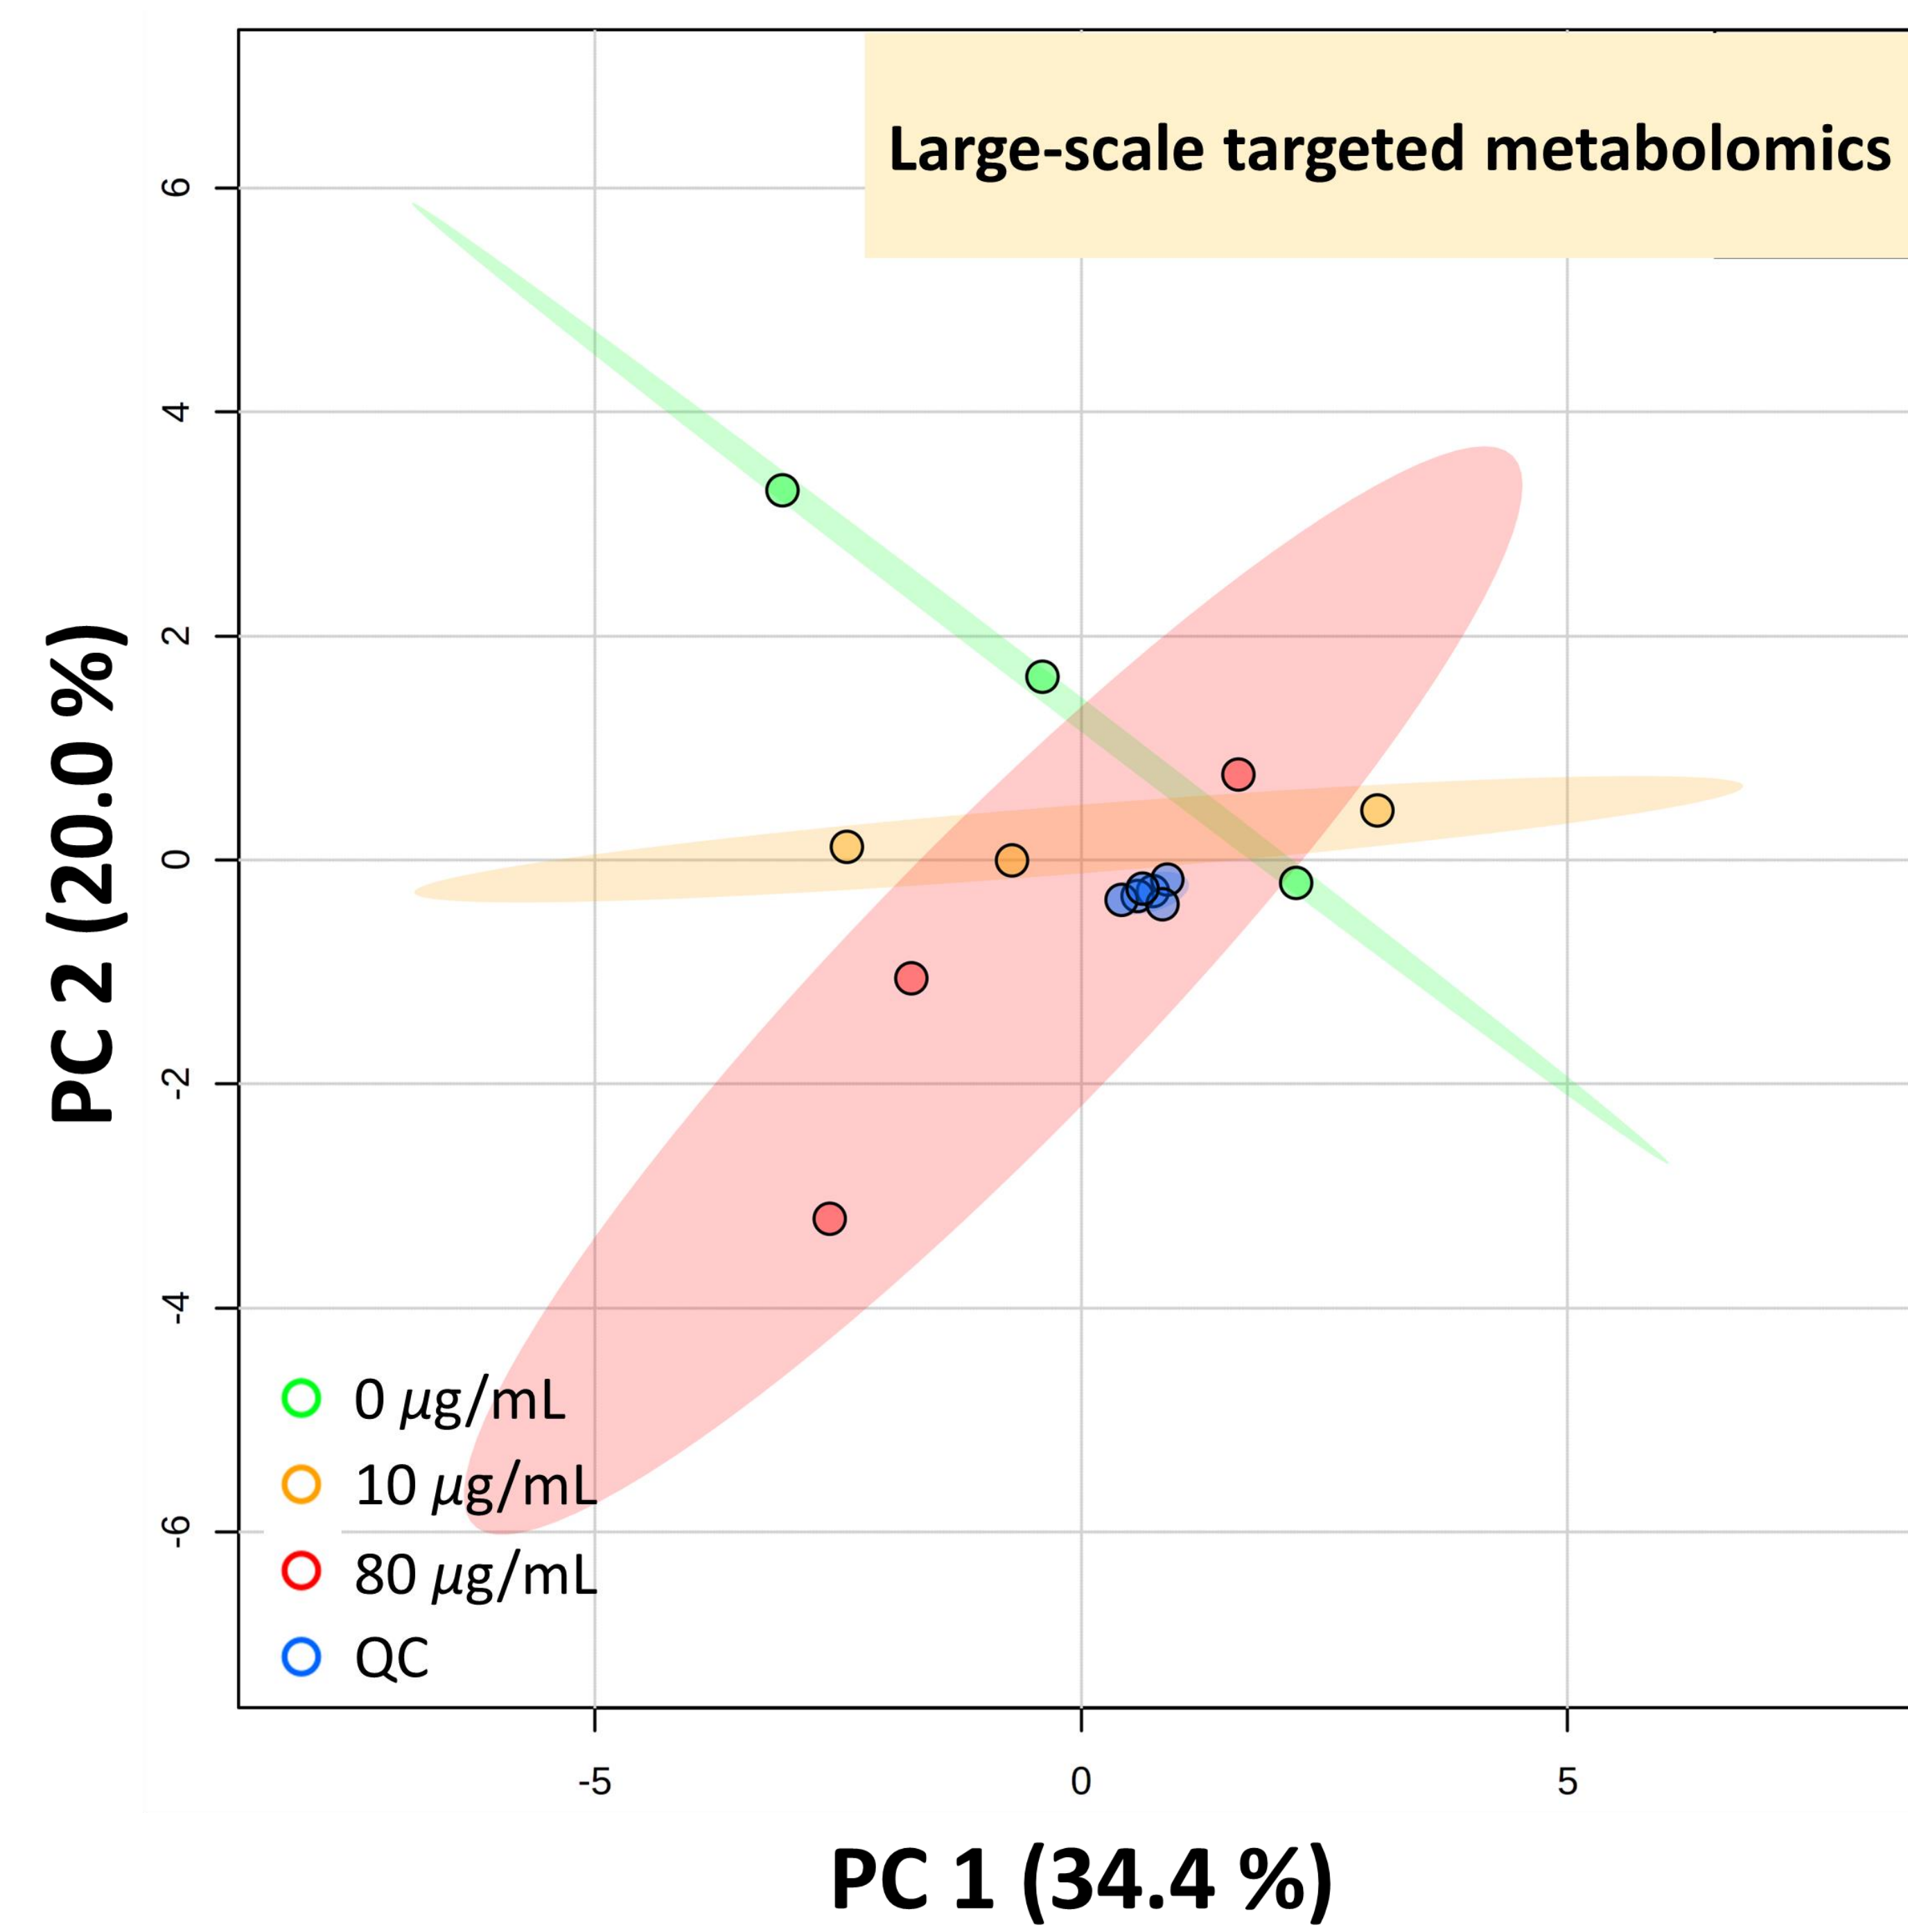

Supplement: d1en00145k3.pdf [file d1en00145k3.pdf]

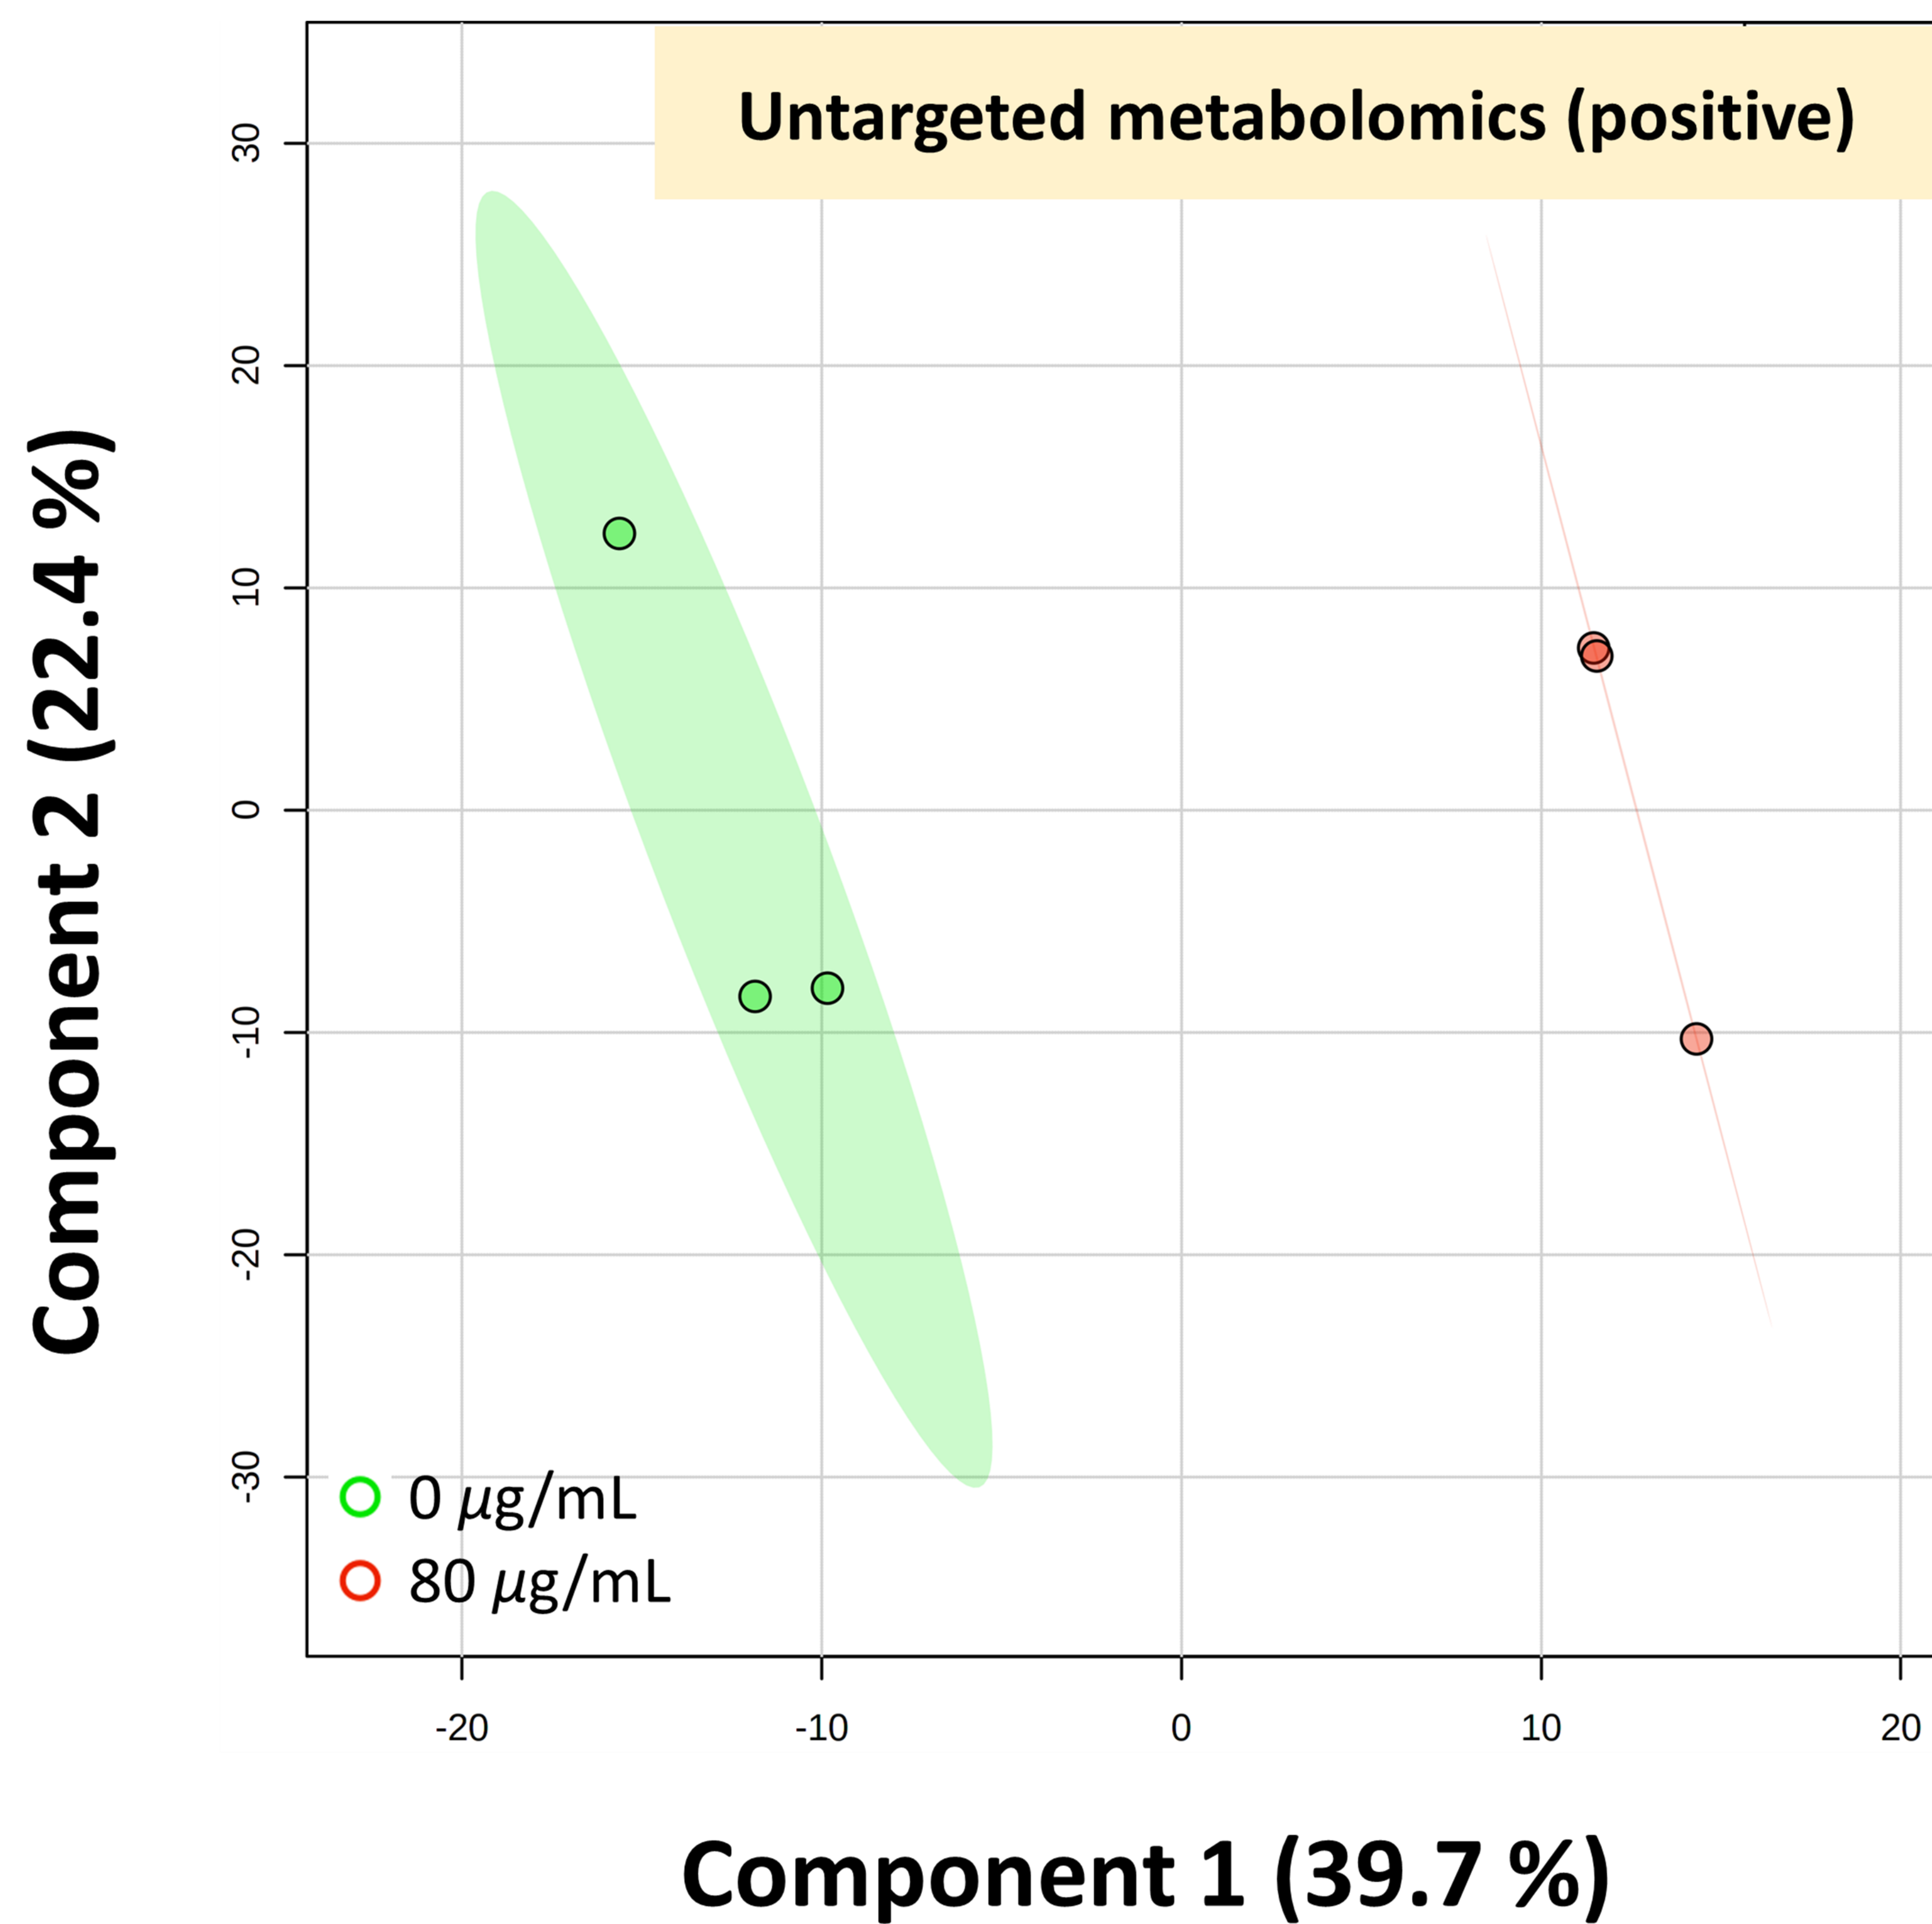

Component 1 (39.7 %)

$R^2: 0.999, Q^2: 0.746$

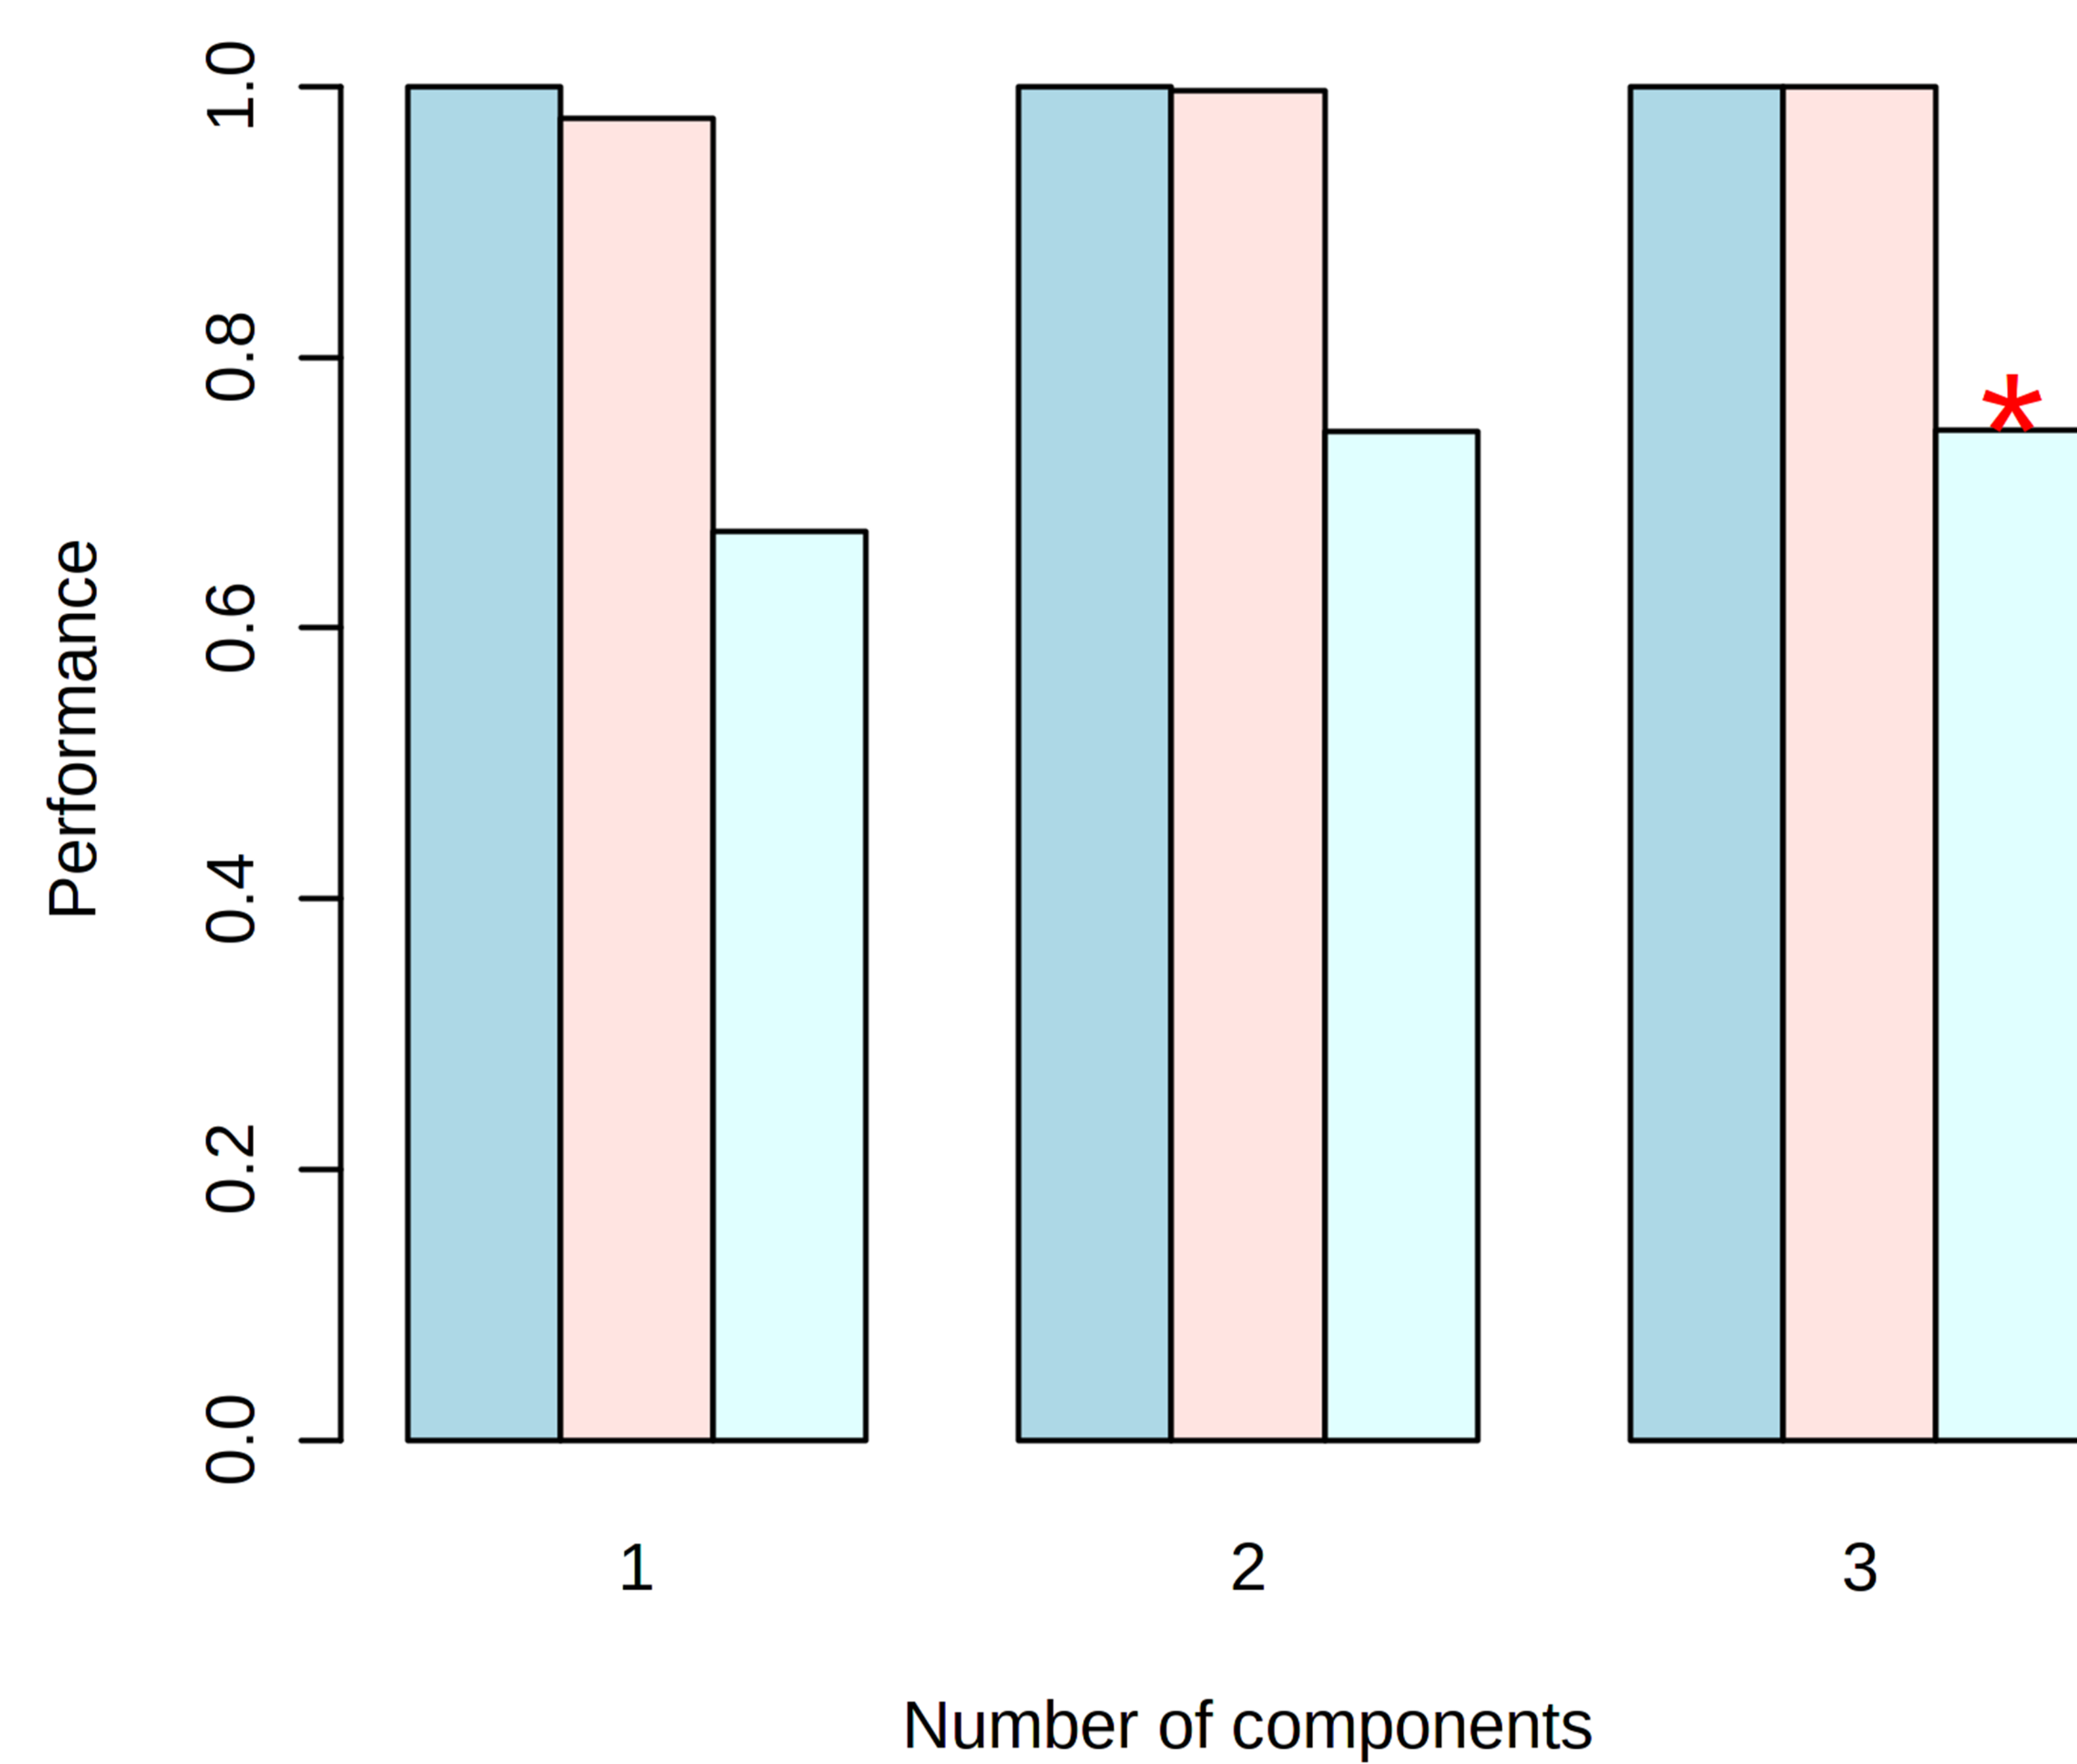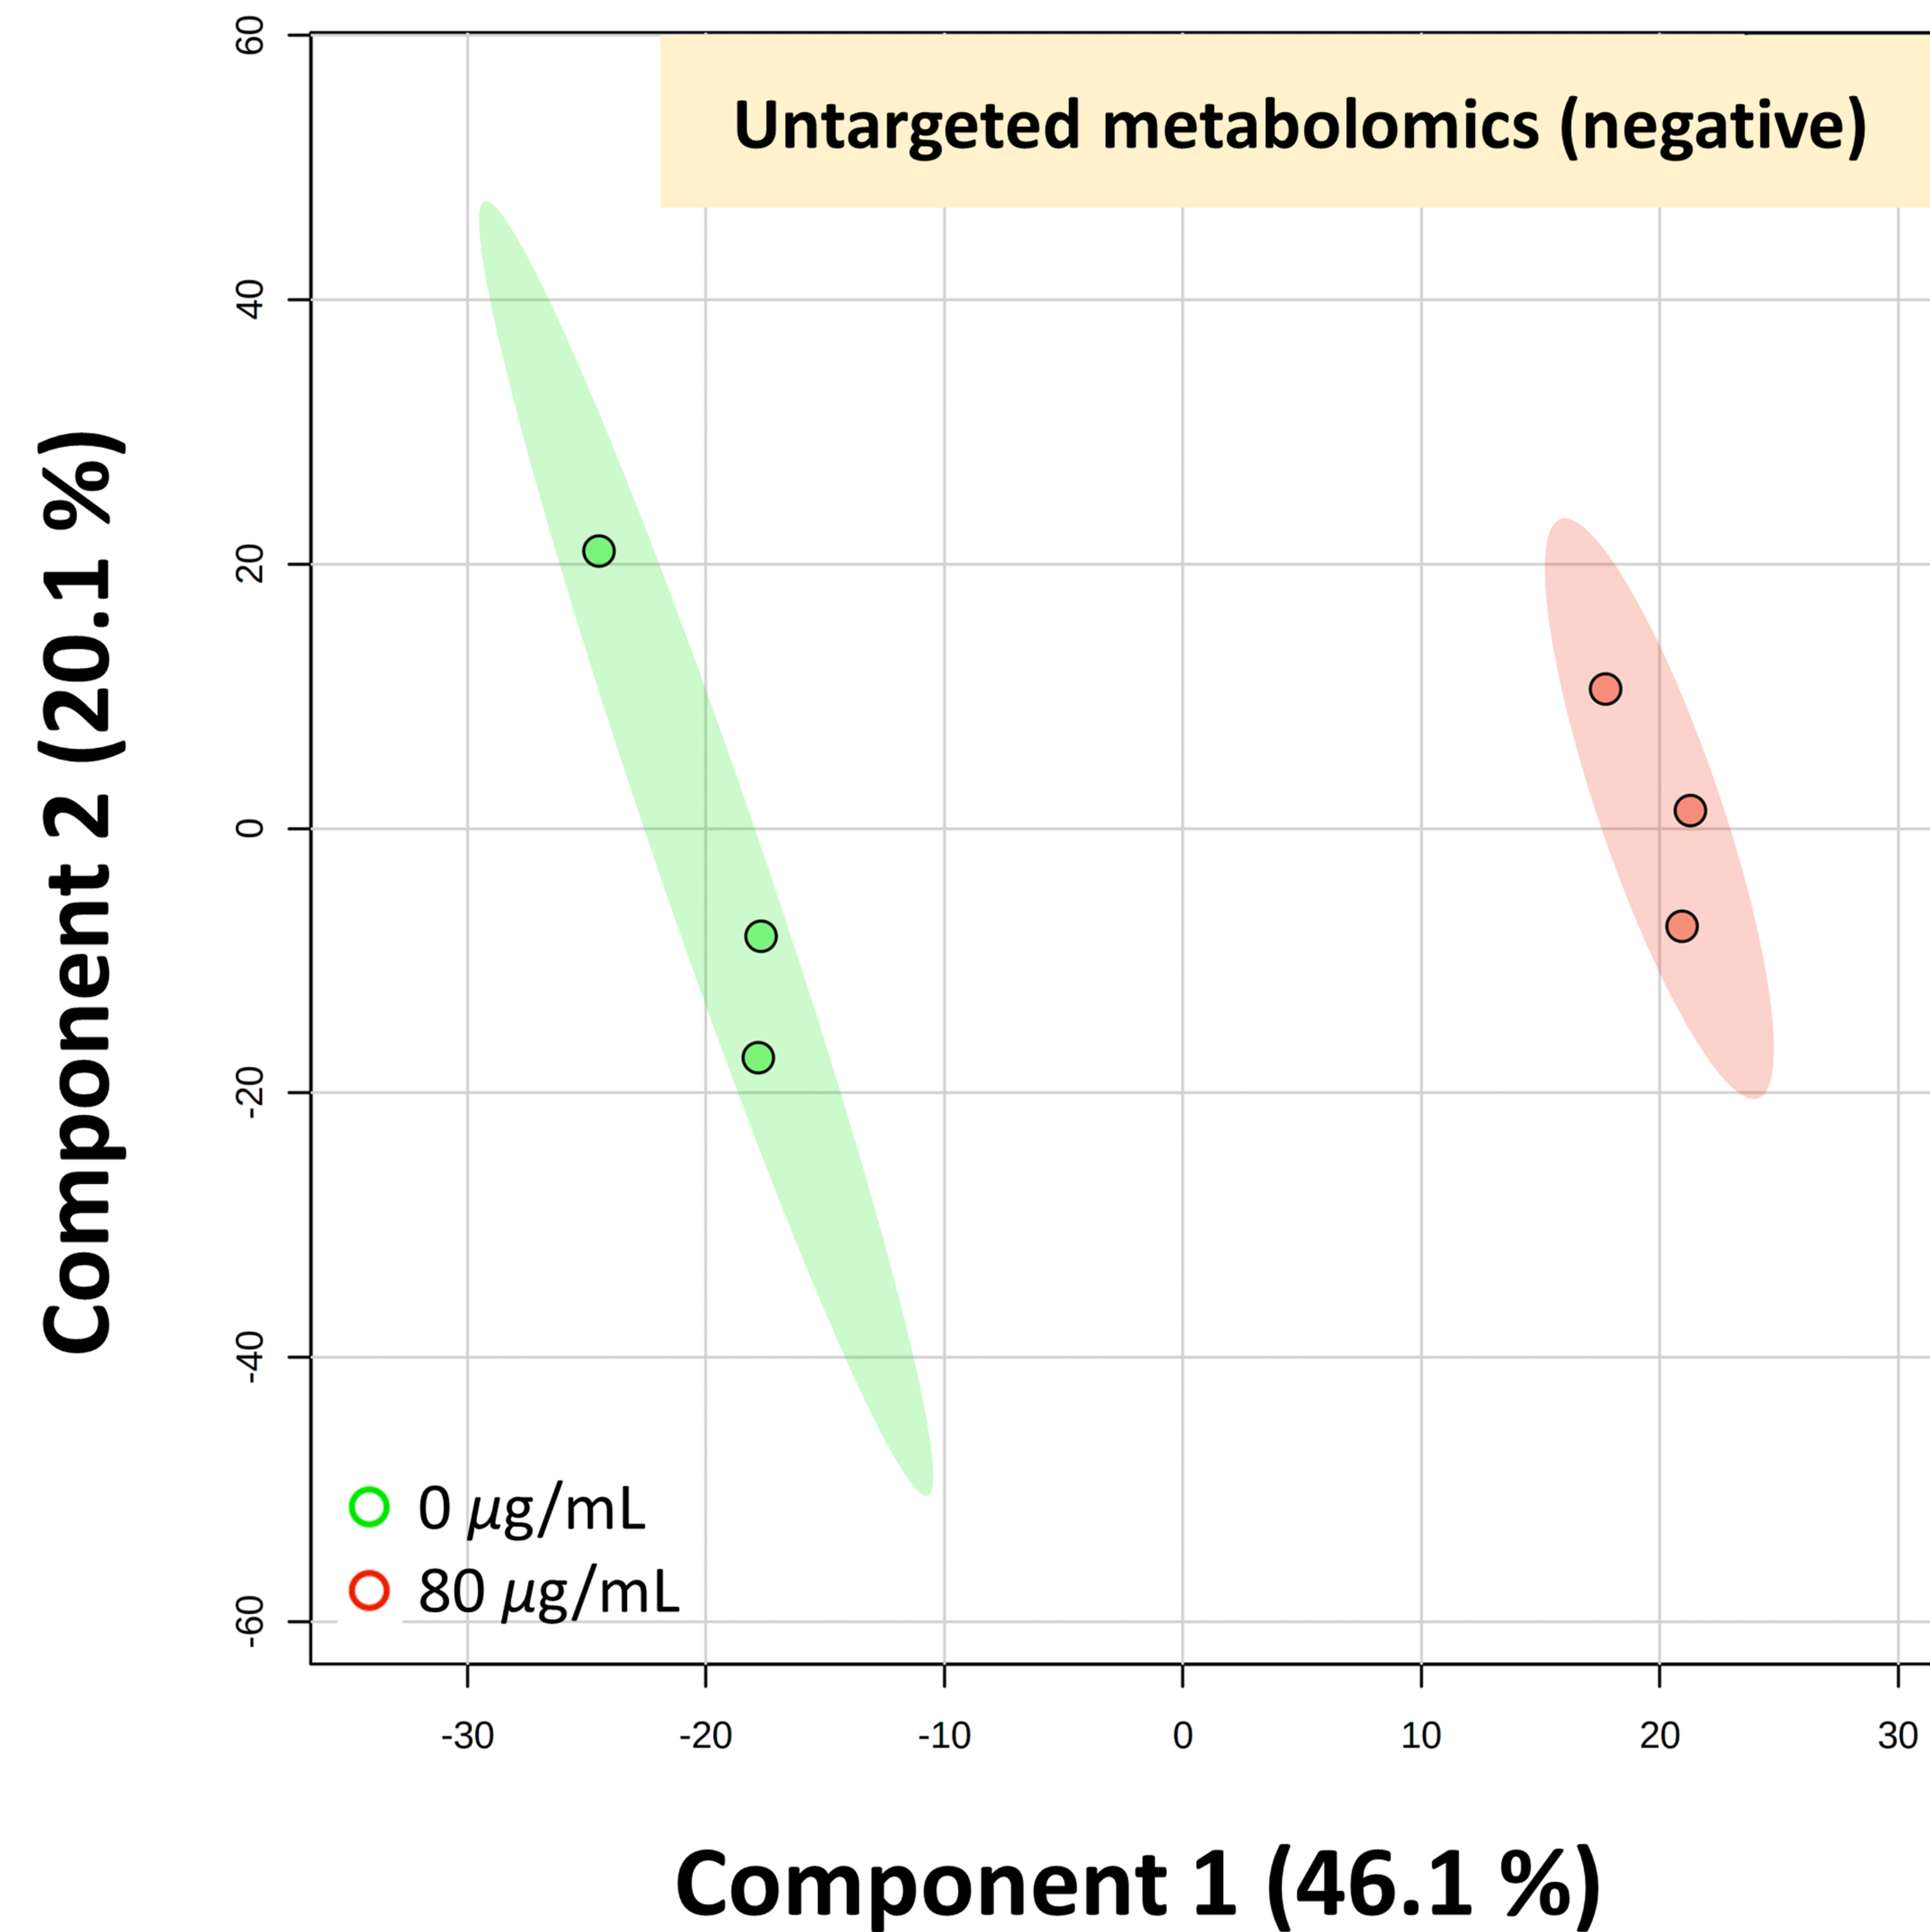

Component 1 (46.1 %)

$R^2: 0.999, Q^2: 0.854$

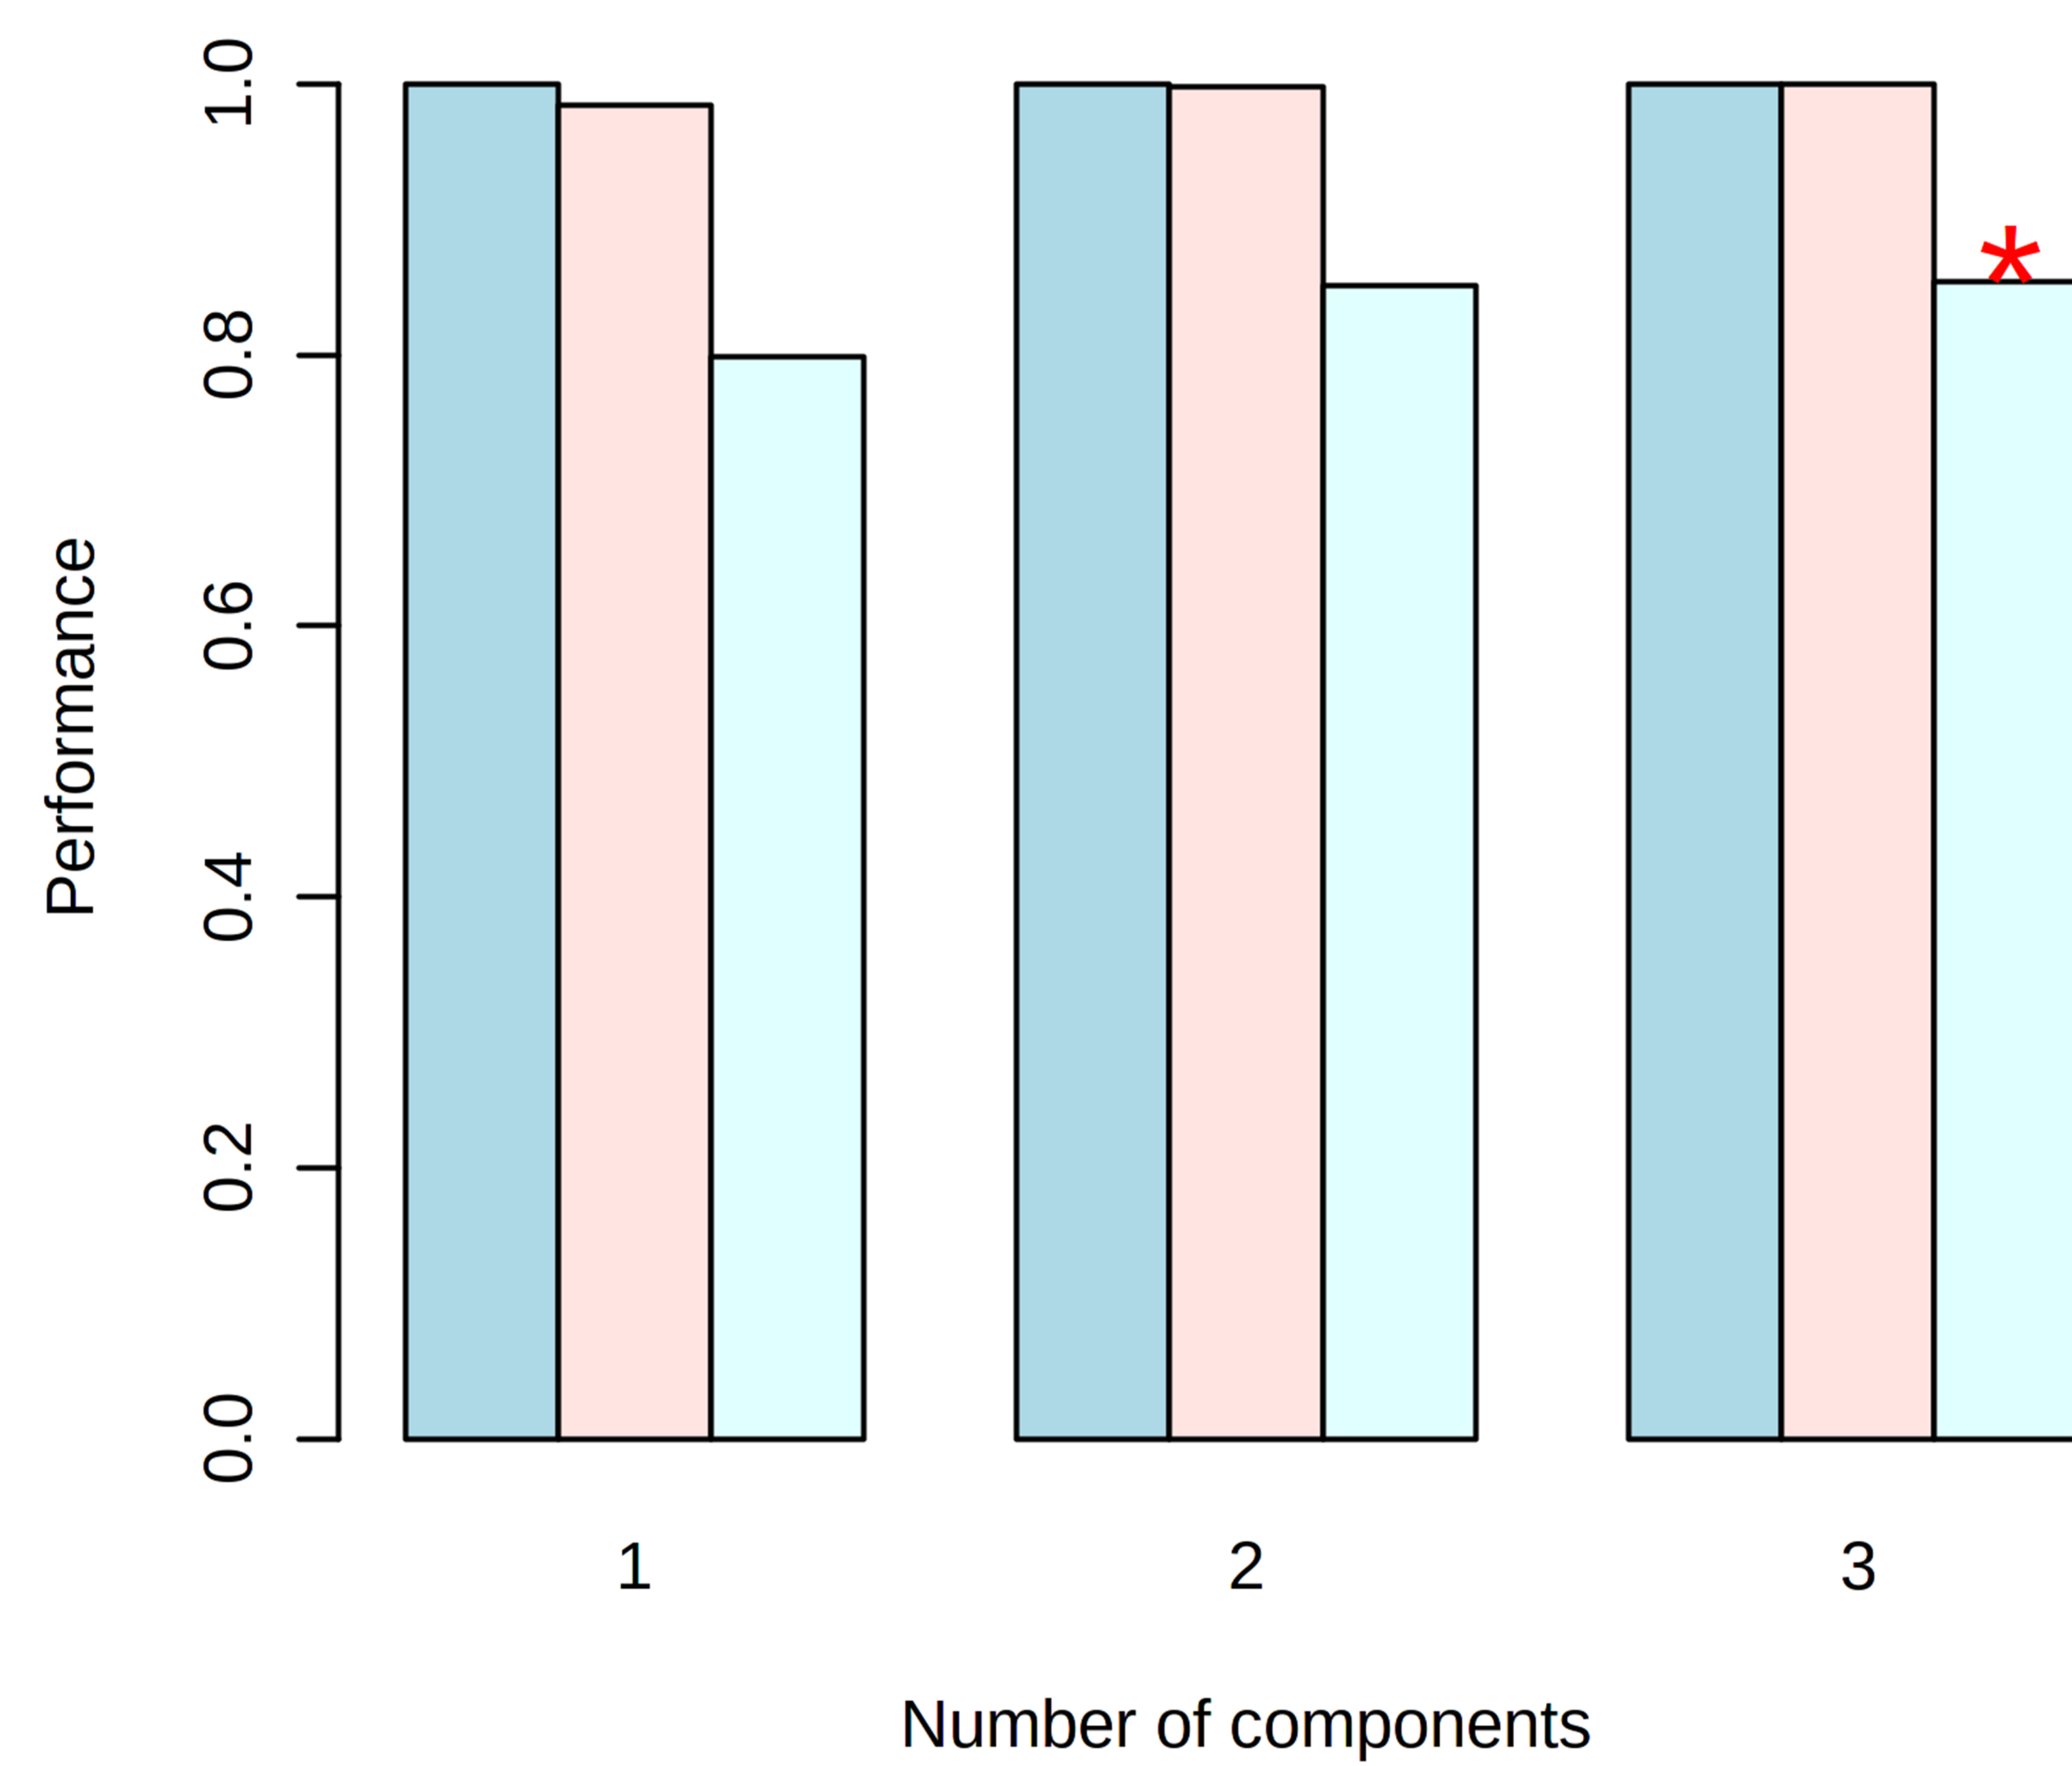

Supplement: d1en00145k4.pdf [file d1en00145k4.pdf]
